# Supplementary material for: Diagnosis and treatment of hyponatremia: a systematic review of clinical practice guidelines and consensus statements
Source: PubMed Central journal article supplement (PMC4276109; doi:10.1186/s12916-014-0231-1), 2014-12-11
Supplement: 12916_2014_231_MOESM1_ESM.pdf [file 12916_2014_231_MOESM1_ESM.pdf]

## **Additional file 1: Table S1. Search Strategies**

### **Search Strategy MEDLINE**

1. Hyponatremia/
2. Inappropriate ADH Syndrome/
3. Water Intoxication/
4. hyponatr?emia.tw.
5. SIAD\$.tw.
6. or/1-5
7. exp guideline/
8. consensus/
9. exp consensus development conference/
10. consensus.tw.
11. position statement\$.tw.
12. exp Policy/
13. recommendation\$.tw.
14. or/7-13
15. 6 and 14

### **Search Strategy EMBASE**

1. Hyponatremia/
2. Inappropriate Vasopressin Secretion/
3. Water Intoxication/
4. hyponatr?emia.tw.
5. SIAD\$.tw.
6. or/1-5
7. exp practice guideline/
8. guideline\$.tw.
9. consensus.tw.
10. position statement\$.tw.
11. exp health care policy/ or exp policy/
12. recommendation\$.tw.
13. or/7-12
14. 6 and 13

### **Additional Searches**

We additionally conducted an online search for professional societies and organisations within the fields of Internal Medicine, Nephrology, Endocrinology and Intensive Care Medicine to identify published guidelines or consensus statements.

These searches were conducted with the Google Chrome web browser using the following strategy:

We first tried to find international societies for each of the disciplines and searched their member societies if a website was provided. If a website was not provided we entered the provided name of the society in the web browser and scanned the first 10 citations. In addition we retrieved a list of the countries of the world from <https://www.cia.gov/library/publications/the-world-factbook/index.html> (accessed on 02/04/2013) and entered each name on the list in combination with the field name and the words 'society' and 'association' and scanned the first 10 citations. An example of the search:

Belgium AND (Nephrology) AND (Society OR Association)

We searched the website of the identified societies, if a uniform resource locator was identified. If a website included a search utility, we searched for guidelines and consensus statements on hyponatraemia by sequentially entering the

search terms 'hyponatraemia' and 'hyponatremia'. If the language used on the website was not English, we entered a search term for hyponatraemia in the appropriate language. We screened all citations thus retrieved. If a website did not provide a search function, we manually screened the website to identify guidance documents.

Finally, we conducted a 'liberal' search of the internet using the strategy (hyponatraemia OR hyponatremia) AND Guideline and screened the first 100 citations.

The included table below shows the identified societies, a uniform resource locator, the date on which the site was accessed, the search strategy used and the number of citations retrieved and the number of guidance documents withheld. EN conducted all additional searches. EN and JV examined all full-texts thus withheld for eligibility.

**Table Additional Searches**

|    | Field                | Country                  | Society/<br>Organisation                                                                | National<br>Name                     | URL                                                                                   | Date Last<br>Search | Search<br>Strategy                       | Titles | CPG | CPG not<br>devoted<br>to hypo-<br>natraemia |
|----|----------------------|--------------------------|-----------------------------------------------------------------------------------------|--------------------------------------|---------------------------------------------------------------------------------------|---------------------|------------------------------------------|--------|-----|---------------------------------------------|
| 1  | Guidelines           | International            | National Guideline<br>Clearinghouse                                                     |                                      | <a href="http://www.guideline.gov/">http://www.guideline.gov/</a>                     | 20/12/2013          | Hyponatremia or Hyponatraemia            | 38     | 0   | 9                                           |
| 2  | Guidelines           | International            | Guidelines International<br>Network                                                     |                                      | <a href="http://www.g-i-n.net">www.g-i-n.net</a>                                      | 20/12/2013          | Hyponatremia or Hyponatraemia            | 1      | 0   | 0                                           |
| 3  | Guidelines           | International            | NHS Evidence                                                                            |                                      | <a href="https://www.evidence.nhs.uk">https://www.evidence.nhs.uk</a>                 | 20/12/2013          | Hyponatremia or Hyponatraemia            | 436    | 0   | 0                                           |
| 4  | Guidelines           | International            | Centre for Reviews and<br>Dissemination                                                 |                                      | <a href="http://www.crd.york.ac.uk">www.crd.york.ac.uk</a>                            | 20/12/2013          | Hyponatremia or Hyponatraemia            | 12     | 0   | 0                                           |
| 5  | Guidelines           | International            | NICE                                                                                    |                                      | <a href="http://www.nice.org.uk">www.nice.org.uk</a>                                  | 20/12/2013          | Hyponatremia or Hyponatraemia            | 4      | 0   | 0                                           |
| 6  | Guidelines           | United<br>Kingdom        | Guidelines and Audit<br>Implementation Network                                          |                                      | <a href="http://www.gain-ni.org">http://www.gain-ni.org</a>                           | 20/12/2013          | hyponatraemia/hyponatremia               | 81     | 1   |                                             |
| 7  | Guidelines           | United<br>Kingdom        | National Institute for<br>Health and Care Excellence<br>Clinical Knowledge<br>Summaries |                                      | <a href="http://cks.nice.org.uk/">http://cks.nice.org.uk/</a>                         | 20/12/2013          | hyponatraemia/hyponatremia               | 4      | 1   |                                             |
| 8  | Internal<br>Medicine | Argentina                | Argentine Medical<br>Association                                                        | Asociación Médica<br>Argentina       | <a href="http://www.ama-med.org.ar/">http://www.ama-med.org.ar/</a>                   | 20/12/2013          | hiponatremia/hyponatremia/hyponatraemia  | 0      |     |                                             |
| 9  | Internal<br>Medicine | Armenia                  | Armenian Medical Society                                                                |                                      | <a href="http://armeda.am/eng/page/about-us/">http://armeda.am/eng/page/about-us/</a> | 20/12/2013          | hyponatraemia/hyponatremia               | 0      |     |                                             |
| 10 | Internal<br>Medicine | Australia/New<br>Zealand | Australia & New Zealand<br>Royal College of Physicians                                  |                                      | <a href="http://www.racp.edu.au">www.racp.edu.au</a>                                  | 20/12/2013          | hyponatraemia/hyponatremia               | 0      |     |                                             |
| 11 | Internal<br>Medicine | Austria                  | Austrian Society of Internal<br>Medicine                                                |                                      | <a href="http://www.oegim.at">www.oegim.at</a>                                        | 20/12/2013          | Hyponatriämie/hyponatremia/hyponatraemia | 0      |     |                                             |
| 12 | Internal<br>Medicine | Bangladesh               | Bangladesh Society of<br>Internal Medicine                                              |                                      |                                                                                       | 20/12/2013          |                                          |        |     |                                             |
| 13 | Internal<br>Medicine | Belarus                  | Society of Internal<br>Medicine of Belarus                                              |                                      |                                                                                       | 20/12/2013          |                                          |        |     |                                             |
| 14 | Internal<br>Medicine | Belgium                  | Belgian Society of Internal<br>Medicine                                                 | Société Belge de<br>Médecine Interne | <a href="http://www.bsim.be">www.bsim.be</a>                                          | 20/12/2013          | hyponatraemia/hyponatremia               | 3      | 0   |                                             |
| 15 | Internal<br>Medicine | Bolivia                  | Bolivian Society of Internal<br>Medicine                                                |                                      |                                                                                       | 20/12/2013          |                                          |        |     |                                             |

|    | Field                | Country               | Society/<br>Organisation                                     | National<br>Name                                                            | URL                              | Date Last<br>Search | Search<br>Strategy                      | Titles | CPG | CPG not<br>devoted<br>to hypo-<br>natraemia |
|----|----------------------|-----------------------|--------------------------------------------------------------|-----------------------------------------------------------------------------|----------------------------------|---------------------|-----------------------------------------|--------|-----|---------------------------------------------|
| 16 | Internal<br>Medicine | Brazil                | Brazilian Society of<br>Internal Medicine                    | Sociedade<br>Brasileira de Clinica<br>Medica                                | www.sbcm.org.br                  | 20/12/2013          |                                         |        |     |                                             |
| 17 | Internal<br>Medicine | Brunei                | Brunei Medical Association                                   |                                                                             | na                               | 20/12/2013          |                                         |        |     |                                             |
| 18 | Internal<br>Medicine | Bulgaria              | Bulgarian Society of<br>Internal Medicine                    |                                                                             |                                  | 20/12/2013          |                                         |        |     |                                             |
| 19 | Internal<br>Medicine | Canada                | Canadian Society of<br>Internal Medicine                     |                                                                             | http://www.csim.ca/index.php/en/ | 20/12/2013          | hyponatraemia/hyponatremia              | 1      | 0   |                                             |
| 20 | Internal<br>Medicine | Chile                 | Chilean Society of Internal<br>Medicine                      | Sociedad Chilena<br>de Medicina<br>Interna                                  | www.smschile.cl                  | 20/12/2013          | hiponatremia/hyponatremia/hyponatraemia | 0      |     |                                             |
| 21 | Internal<br>Medicine | China                 | Chinese Society of Internal<br>Medicine,                     |                                                                             |                                  | 20/12/2013          |                                         |        |     |                                             |
| 22 | Internal<br>Medicine | Colombia              | Colombian Society of<br>Internal Medicine                    | Asociacion<br>Colombiana de<br>Medicina Interna                             | www.acmi.org.co                  | 20/12/2013          | hiponatremia/hyponatremia/hyponatraemia | 0      |     |                                             |
| 23 | Internal<br>Medicine | Croatia               | Croatian Society of<br>Internal Medicine                     |                                                                             |                                  | 20/12/2013          |                                         |        |     |                                             |
| 24 | Internal<br>Medicine | Cuba                  | Cuban Society of Internal<br>Medicine                        | Sociedad Cubana<br>de Medicina<br>Interna                                   |                                  | 20/12/2013          |                                         |        |     |                                             |
| 25 | Internal<br>Medicine | Czech<br>Republic     | Czech Society of Internal<br>Medicine                        |                                                                             | www.interna-cz-eu                | 20/12/2013          |                                         |        |     |                                             |
| 26 | Internal<br>Medicine | Dominican<br>Republic | Society of Internal<br>Medicine of the Dominican<br>Republic | Sociedad de<br>Medicina Interna<br>de la República<br>Dominicana<br>(SMIRD) |                                  | 20/12/2013          |                                         |        |     |                                             |
| 27 | Internal<br>Medicine | Egypt                 | Egyptian Society of<br>Internal Medicine                     |                                                                             | http://www.esim.org.eg/          | 20/12/2013          |                                         |        |     |                                             |
| 28 | Internal<br>Medicine | Equador               | Equatorian Society of<br>Internal Medicine                   | Asociacion<br>Ecuatoriana de<br>Medicina Interna                            | aemi.med.ec                      | 20/12/2013          |                                         |        |     |                                             |
| 29 | Internal<br>Medicine | Estonia               | Estonian Society of<br>Internal Medicine                     |                                                                             |                                  | 20/12/2013          |                                         |        |     |                                             |
| 30 | Internal<br>Medicine | Finland               | Finnish Society of Internal<br>Medicine                      |                                                                             |                                  | 20/12/2013          |                                         |        |     |                                             |
| 31 | Internal<br>Medicine | France                | French Society of Internal<br>Medicine                       | Société Nationale<br>Française de<br>Médecine Interne                       | www.snfmi.org                    | 20/12/2013          | hyponatrémie/hyponatremia/hyponatraemia | 29     | 0   |                                             |

|    | Field                | Country       | Society/<br>Organisation                       | National<br>Name                                  | URL                                 | Date Last<br>Search | Search<br>Strategy                      | Titles | CPG | CPG not<br>devoted<br>to hypo-<br>natraemia |
|----|----------------------|---------------|------------------------------------------------|---------------------------------------------------|-------------------------------------|---------------------|-----------------------------------------|--------|-----|---------------------------------------------|
| 32 | Internal<br>Medicine | Georgia       | Georgian Society of<br>Internal Medicine       |                                                   |                                     | 20/12/2013          |                                         |        |     |                                             |
| 33 | Internal<br>Medicine | Germany       | German Society of Internal<br>Medicine         | Deutsche<br>Gesellschaft für<br>Innere Medizin    | www.dgim.de                         | 20/12/2013          |                                         |        |     |                                             |
| 34 | Internal<br>Medicine | Ghana         | Ghana Society of Internal<br>Medicine          |                                                   |                                     | 20/12/2013          |                                         |        |     |                                             |
| 35 | Internal<br>Medicine | Guatemala     | Guatemalan Society of<br>Internal Medicine     | Asociacion de<br>Medicina Interna<br>de Guatemala | www.asomigua.com                    | 20/12/2013          |                                         |        |     |                                             |
| 36 | Internal<br>Medicine | Hungary       | Hungarian Society of<br>Internal Medicine      |                                                   |                                     | 20/12/2013          |                                         |        |     |                                             |
| 37 | Internal<br>Medicine | India         | Association of Physicians<br>of India          |                                                   | www.apiindia.org                    | 20/12/2013          |                                         |        |     |                                             |
| 38 | Internal<br>Medicine | Indonesia     | Indonesian Society of<br>Internal Medicine     |                                                   | www.pbpapdi.org                     | 20/12/2013          | hiponatremia/hyponatremia/hyponatraemia | 0      | 0   |                                             |
| 39 | Internal<br>Medicine | International | International Society of<br>Internal Medicine  |                                                   | http://www.isim-online.org/         | 20/12/2013          |                                         |        |     |                                             |
| 40 | Internal<br>Medicine | International | International Association<br>of Internists     |                                                   | http://www.iainternalmeds.com/      | 20/12/2013          |                                         |        |     |                                             |
| 41 | Internal<br>Medicine | International | European Federation of<br>Internal Medicine    |                                                   | http://www.efim.org/                | 20/12/2013          | hyponatraemia/hyponatremia              | 0      |     |                                             |
| 42 | Internal<br>Medicine | Iran          | Iranian Society of Internal<br>Medicine        |                                                   | www.dakheli.org                     | 20/12/2013          |                                         |        |     |                                             |
| 43 | Internal<br>Medicine | Israel        | Israel Society of Internal<br>Medicine         |                                                   |                                     | 20/12/2013          |                                         |        |     |                                             |
| 44 | Internal<br>Medicine | Italy         | Italian Society of Internal<br>Medicine        |                                                   | www.simi.it                         | 20/12/2013          |                                         | 10     | 0   |                                             |
| 45 | Internal<br>Medicine | Japan         | The Japanese Society of<br>Internal Medicine   |                                                   | www.naika.or.jp                     | 20/12/2013          |                                         |        |     |                                             |
| 46 | Internal<br>Medicine | Jordan        | Jordanian Society of<br>Internal Medicine      |                                                   | http://www.internalmedicine-jo.com/ | 20/12/2013          | hyponatraemia/hyponatremia              | 0      |     |                                             |
| 47 | Internal<br>Medicine | Korea, South  | The Korean Association of<br>Internal Medicine |                                                   | www.kaim.or.kr                      | 20/12/2013          |                                         |        |     |                                             |
| 48 | Internal<br>Medicine | Latvia        | Latvian Society of Internal<br>Medicine        |                                                   |                                     | 20/12/2013          |                                         |        |     |                                             |
| 49 | Internal<br>Medicine | Lithuania     | Lithuanian Society of<br>Internal Medicine     |                                                   |                                     | 20/12/2013          |                                         |        |     |                                             |

|    | Field                | Country     | Society/<br>Organisation                       | National<br>Name                                  | URL                        | Date Last<br>Search | Search<br>Strategy | Titles | CPG | CPG not<br>devoted<br>to hypo-<br>natraemia |
|----|----------------------|-------------|------------------------------------------------|---------------------------------------------------|----------------------------|---------------------|--------------------|--------|-----|---------------------------------------------|
| 50 | Internal<br>Medicine | Macedonia   | Macedonian Assotiation of<br>Internal Medicine |                                                   | na                         | 20/12/2013          |                    |        |     |                                             |
| 51 | Internal<br>Medicine | Mexico      | Mexican Society of<br>Internal Medicine        | Asociacion de<br>Medicina Interna<br>de Mexico    | www.cmim.org               | 20/12/2013          |                    |        |     |                                             |
| 52 | Internal<br>Medicine | Nicaragua   | Nicaraguan Society of<br>Internal Medicine     | Asociacion<br>Nigaragüense de<br>Medicina Interna | www.amnica.org             | 20/12/2013          |                    |        |     |                                             |
| 53 | Internal<br>Medicine | Nigeria     | Association of Physicians<br>of Nigeria        |                                                   |                            | 20/12/2013          |                    |        |     |                                             |
| 54 | Internal<br>Medicine | Norway      | Norwegian Society of<br>Internal Medicine      |                                                   |                            | 20/12/2013          |                    |        |     |                                             |
| 55 | Internal<br>Medicine | Panama      | Panama Society of Internal<br>Medicine         | Sociedad<br>Panamena de<br>Medicina Interna       |                            | 20/12/2013          |                    |        |     |                                             |
| 56 | Internal<br>Medicine | Paraguay    | Paraguay Society of<br>Internal Medicine       | Sociedad<br>Paraguaya de<br>Medicina Interna      |                            | 20/12/2013          |                    |        |     |                                             |
| 57 | Internal<br>Medicine | Peru        | Peruan Society of Internal<br>Medicine         | Sociedad Peruana<br>de Medicina<br>Interna        | www.medicinainterna.com.pe | 20/12/2013          |                    |        |     |                                             |
| 58 | Internal<br>Medicine | Philippines | Philippinian College of<br>Physicians          |                                                   | www.pcp.org.ph             | 20/12/2013          |                    |        |     |                                             |
| 59 | Internal<br>Medicine | Poland      | Polish Society of Internal<br>Medicine         |                                                   |                            | 20/12/2013          |                    |        |     |                                             |
| 60 | Internal<br>Medicine | Portugal    | Portugese Society of<br>Internal Medicine      | Sociedad<br>Portuguesa de<br>Medicina Interna     | www.spmi.pt                | 20/12/2013          |                    |        |     |                                             |
| 61 | Internal<br>Medicine | Romania     | Romanian Society of<br>Internal Medicine       | Rumänische<br>Gesellschaft für<br>Innere Medizin  | www.srmi.ro                | 20/12/2013          |                    |        |     |                                             |
| 62 | Internal<br>Medicine | Russia      | Russian Society of Internal<br>Medicine        |                                                   | www.rsmsim.ru              | 20/12/2013          |                    |        |     |                                             |
| 63 | Internal<br>Medicine | Serbia      | Serbian Association of<br>Internal Medicine    |                                                   | www.uis.org.rs             | 20/12/2013          |                    |        |     |                                             |
| 64 | Internal<br>Medicine | Singapore   | College of Physicians,<br>Singapore            |                                                   | www.cps.ams.edu.sg         | 20/12/2013          |                    |        |     |                                             |
| 65 | Internal<br>Medicine | Slovakia    | Slovak Society of Internal<br>Medicine         |                                                   |                            | 20/12/2013          |                    |        |     |                                             |
| 66 | Internal<br>Medicine | Slovenia    | Slovenian Association of<br>Internal Medicine  |                                                   |                            | 20/12/2013          |                    |        |     |                                             |

|    | Field                | Country                  | Society/<br>Organisation                                                            | National<br>Name                                                      | URL                        | Date Last<br>Search | Search<br>Strategy                       | Titles | CPG | CPG not<br>devoted<br>to hypo-<br>natraemia |
|----|----------------------|--------------------------|-------------------------------------------------------------------------------------|-----------------------------------------------------------------------|----------------------------|---------------------|------------------------------------------|--------|-----|---------------------------------------------|
| 67 | Internal<br>Medicine | South Africa             | The Faculty of Consulting<br>Physicians of South Africa                             |                                                                       | www.physician.co.za        | 20/12/2013          |                                          |        |     |                                             |
| 68 | Internal<br>Medicine | Spain                    | Spanish Society of Internal<br>Medicine                                             | Sociedad Española<br>de Medicina<br>Interna                           | www.fesemi.org             | 20/12/2013          |                                          |        |     |                                             |
| 69 | Internal<br>Medicine | Sweden                   | Swedish Society of Internal<br>Medicine                                             |                                                                       | www.sim.nu                 | 20/12/2013          |                                          |        |     |                                             |
| 70 | Internal<br>Medicine | Switzerland              | Swiss Society of Internal<br>Medicine                                               |                                                                       | www.sgim.ch                | 20/12/2013          |                                          |        |     |                                             |
| 71 | Internal<br>Medicine | Taiwan                   | Taiwan Society of Internal<br>Medicine                                              |                                                                       | www.sim.org.tw             | 20/12/2013          |                                          |        |     |                                             |
| 72 | Internal<br>Medicine | The<br>Netherlands       | The Netherlands<br>Association of Internal<br>Medicine                              |                                                                       | www.internisten.nl         | 20/12/2013          | hyponatriëmie/hyponatremia/hyponatraemia | 3      | 0   |                                             |
| 73 | Internal<br>Medicine | Turkey                   | Turkish Society of Internal<br>Medicine                                             |                                                                       | www.tihud.org.tr           | 20/12/2013          |                                          |        |     |                                             |
| 74 | Internal<br>Medicine | Ukraine                  | Ukrainian Association of<br>Internal Medicine                                       |                                                                       |                            | 20/12/2013          |                                          |        |     |                                             |
| 75 | Internal<br>Medicine | United<br>Kingdom        | Royal College of Physicians                                                         |                                                                       | www.rcplondon.ac.uk        | 20/12/2013          | hyponatraemia/hyponatremia               | 1      | 0   |                                             |
| 76 | Internal<br>Medicine | Uruguay                  | Uruguayan Society of<br>Internal Medicine                                           | Sociedad de<br>Medicina del<br>Uruguay                                | www.medicinainterna.org.uy | 20/12/2013          |                                          |        |     |                                             |
| 77 | Internal<br>Medicine | USA                      | The American College of<br>Physicians – American<br>Society of Internal<br>Medicine |                                                                       | www.acponline.org          | 20/12/2013          |                                          |        |     |                                             |
| 78 | Internal<br>Medicine | Venezuela                | Venezuelan Society of<br>Internal Medicine                                          | Sociedad<br>Venezolana de<br>Medicina Interna                         | www.svmi.web.ve            | 20/12/2013          |                                          |        |     |                                             |
| 79 | Nephrology           | Albania                  | Albanian Society of<br>Nephrology                                                   |                                                                       | na                         | 21/12/2013          |                                          | 0      |     |                                             |
| 80 | Nephrology           | Algeria                  | Algerian Society of<br>Nephrology, Dialysis and<br>Transplantation                  | Société Algérienne<br>de Néphrologie,<br>Dialyse &<br>Transplantation | na                         | 21/12/2013          |                                          | 0      |     |                                             |
| 81 | Nephrology           | Argentina                | Argentinian Society of<br>Nephrology                                                | Sociedad Argentina<br>de Nefrología                                   | www.san.org.ar             | 21/12/2013          | hiponatremia/hyponatremia/hyponatraemia  | 0      |     |                                             |
| 82 | Nephrology           | Australia/New<br>Zealand | Kidney Health<br>Australia/Caring for<br>Australasians with Renal<br>Disease        |                                                                       | http://www.cari.org.au     | 21/12/2013          | hyponatraemia/hyponatremia               | 0      |     |                                             |

| Field | Country    | Society/<br>Organisation | National<br>Name                                                                     | URL                                                                                        | Date Last<br>Search                                                         | Search<br>Strategy | Titles                                     | CPG | CPG not<br>devoted<br>to hypo-<br>natraemia |
|-------|------------|--------------------------|--------------------------------------------------------------------------------------|--------------------------------------------------------------------------------------------|-----------------------------------------------------------------------------|--------------------|--------------------------------------------|-----|---------------------------------------------|
| 83    | Nephrology | Austria                  | Austrian Society of Nephrology                                                       | Österreichische Gesellschaft für Nephrologie                                               | <a href="http://www.niere-hochdruck.at/">http://www.niere-hochdruck.at/</a> | 21/12/2013         | Hyponatriämie                              | 0   |                                             |
| 84    | Nephrology | Bangladesh               | Bangladesh Renal Association                                                         |                                                                                            | <a href="http://www.bra-bd.org">http://www.bra-bd.org</a>                   | 21/12/2013         | hyponatraemia/hyponatremia                 |     |                                             |
| 85    | Nephrology | Belarus                  | Bielorussian Society of Nephrology                                                   |                                                                                            | na                                                                          | 21/12/2013         |                                            |     |                                             |
| 86    | Nephrology | Belgium                  | Belgian Society of Nephrology                                                        | Société Belge de Néphrologie - Belgische Vereniging voor Nefrologie                        | <a href="http://www.bvn-sbn.be">http://www.bvn-sbn.be</a>                   | 21/12/2013         | hyponatriëmie                              | 0   |                                             |
| 87    | Nephrology | Bolivia                  | Bolivian Society of Nephrology                                                       | Sociedad Boliviana de Nefrologia                                                           | na                                                                          | 21/12/2013         |                                            |     |                                             |
| 88    | Nephrology | Bosnia and Herzegovina   | Society of Nephrology, Dialysis and Kidney Transplantation in Bosnia and Herzegovina | Udruženje Ijekara za Nefrologiju, Dijalizu i Transplantaciju Bubrega u Bosni i Hercegovini | <a href="http://www.undt.ba">http://www.undt.ba</a>                         | 21/12/2013         | hyponatremia/hyponatraemia                 | 0   |                                             |
| 89    | Nephrology | Brazil                   | Brazilian Society of Nephrology                                                      | Sociedade Brasileira de Nefrologia                                                         | <a href="http://www.sbn.org.br">http://www.sbn.org.br</a>                   | 21/12/2013         | hiponatremia/hyponatremia/hyponatraemia    | 45  | 0                                           |
| 90    | Nephrology | Bulgaria                 | Bulgarian Society of Nephrology                                                      | Българското нефрологично дружество                                                         | <a href="http://www.bgnephrology.com">http://www.bgnephrology.com</a>       | 21/12/2013         | хипонатриемия/hyponatremia/hyponatraemia   | 2   | 0                                           |
| 91    | Nephrology | Canada                   | Canadian Society of Nephrology                                                       | Canadian Society of Nephrology                                                             | <a href="https://www.csnsn.ca/en/">https://www.csnsn.ca/en/</a>             | 21/12/2013         | hyponatremia/hyponatraemia                 | 0   |                                             |
| 92    | Nephrology | Chile                    | Chilean Society of Nephrology                                                        | Sociedad Chilena de Nefrologia                                                             | <a href="http://www.nefro.cl/">http://www.nefro.cl/</a>                     | 21/12/2013         | hiponatremia/hyponatremia/hyponatraemia    | 0   |                                             |
| 93    | Nephrology | China                    | Chinese Society of Nephrology                                                        |                                                                                            | na                                                                          | 21/12/2013         |                                            |     |                                             |
| 94    | Nephrology | Colombia                 | Colombian Association of Nephrology and Arterial Hypertension                        | Asociacion Colombiana de Nefrologia e Hipertension Arterial                                | <a href="http://www.asocolnef.com">http://www.asocolnef.com</a>             | 21/12/2013         | hiponatremia/hyponatremia/hyponatraemia    | 0   |                                             |
| 95    | Nephrology | Costa Rica               | Costa Rican Association of Nephrology                                                | Asociacion Costarricense de Nefrologia                                                     | <a href="http://www.ascone.org">http://www.ascone.org</a>                   | 21/12/2013         |                                            |     |                                             |
| 96    | Nephrology | Croatia                  | Croatian Society for Nephrology, Dialysis and Transplantation                        | Hrvatsko Društvo za Nefrologiju, Dijalizu i Transplantaciju                                | <a href="http://www.hdndt.org">http://www.hdndt.org</a>                     | 21/12/2013         | hiponatrijemija/hyponatremia/hyponatraemia | 0   |                                             |



|     | Field      | Country           | Society/<br>Organisation                                               | National<br>Name                                                      | URL                                         | Date Last<br>Search | Search<br>Strategy                       | Titles | CPG | CPG not<br>devoted<br>to hypo-<br>natraemia |
|-----|------------|-------------------|------------------------------------------------------------------------|-----------------------------------------------------------------------|---------------------------------------------|---------------------|------------------------------------------|--------|-----|---------------------------------------------|
| 97  | Nephrology | Cuba              | Cuban Society of<br>Nephrologia                                        | Sociedad Cubana<br>de Nefrologia                                      | na                                          | 21/12/2013          |                                          |        |     |                                             |
| 98  | Nephrology | Cyprus            | Cypriot Society of<br>Nephrology                                       |                                                                       | na                                          | 21/12/2013          |                                          |        |     |                                             |
| 99  | Nephrology | Czech<br>Republic | Czech Society of<br>Nephrology                                         | Česká nefrologická<br>společnost                                      | http://www.nefrol.cz                        | 21/12/2013          | hyponatremie/hyponatremia/hyponatraemia  | 0      |     |                                             |
| 100 | Nephrology | Danmark           | Danish Society of<br>Nephrology                                        | Dansk Nefrologisk<br>Selskab                                          | http://www.nephrology.dk                    | 21/12/2013          | hyponatriæmi//hyponatremia/hyponatraemia | 4      | 0   |                                             |
| 101 | Nephrology | Egypt             | The Egyptian Society of<br>Nephrology &<br>Transplantation             | The Egyptian<br>Society of<br>Nephrology &<br>Transplantation         | http://www.esnonline.net                    | 21/12/2013          | hyponatremia/hyponatraemia               | 0      |     |                                             |
| 102 | Nephrology | Equador           | Society of Equador of<br>Nephrology                                    | Sociedad<br>Ecuatoriana de<br>Nefrologia                              | http://sociedadecuatorianadenefrologia.org/ | 21/12/2013          | hiponatremia/hyponatremia/hyponatraemia  | 0      |     |                                             |
| 103 | Nephrology | Estonia           | Estonian Society of<br>Nephrology                                      |                                                                       | na                                          | 21/12/2013          |                                          |        |     |                                             |
| 104 | Nephrology | Finland           | Finnish Society of<br>Nephrology                                       | Suomen<br>Nefrologiyhdistys -<br>Finlands<br>Nefrologförening<br>r.y. | http://www.sny.fi                           | 21/12/2013          | hyponatremia/hyponatraemia               | 0      |     |                                             |
| 105 | Nephrology | France            | French Speaking Society of<br>Dialysis                                 | Société<br>francophone de<br>dialyse                                  | http://www.sfdial.org                       | 21/12/2013          | hyponatremie/hyponatremia/hyponatraemia  | 0      |     |                                             |
| 106 | Nephrology | France            | French Society of<br>Nephrology                                        | Société<br>Francophone de<br>Néphrologie                              | http://www.soc-nephrologie.org              | 21/12/2013          | hyponatremie/hyponatremia/hyponatraemia  | 35     | 0   |                                             |
| 107 | Nephrology | Georgia           | Dialysis, Nephrology and<br>Kidney Transplantation<br>Union of Georgia |                                                                       | http://dntunion.ge                          | 21/12/2013          | hyponatremia/hyponatraemia               | 2      | 0   |                                             |
| 108 | Nephrology | Germany           | German Society of<br>Nephrology                                        | Deutsche<br>Gesellschaft für<br>Nephrologie                           | http://www.dgfn.eu/                         | 21/12/2013          | hyponatriämie                            | 0      |     |                                             |
| 109 | Nephrology | Greece            | Hellenic Society of<br>Nephrology                                      | Ελληνική<br>Νεφρολογική<br>Εταιρεία                                   | http://www.ene.gr                           | 21/12/2013          |                                          | 0      |     |                                             |
| 110 | Nephrology | Hong Kong         | Hong Kong Society of<br>Nephrology                                     |                                                                       |                                             | 21/12/2013          |                                          |        |     |                                             |

|     | Field      | Country       | Society/<br>Organisation                                    | National<br>Name                                                 | URL                                                                 | Date Last<br>Search | Search<br>Strategy                          | Titles | CPG | CPG not<br>devoted<br>to hypo-<br>natraemia |
|-----|------------|---------------|-------------------------------------------------------------|------------------------------------------------------------------|---------------------------------------------------------------------|---------------------|---------------------------------------------|--------|-----|---------------------------------------------|
| 111 | Nephrology | Hungary       | Hungarian Society of<br>Nephrology                          | Magyar<br>Nephrologiai<br>Társaság                               | <a href="http://www.nephrologia.hu">http://www.nephrologia.hu</a>   | 21/12/2013          | hyponatraemia/hyponatremia                  | 7      | 0   |                                             |
| 112 | Nephrology | Iceland       | Icelandic Renal Association                                 |                                                                  | na                                                                  | 21/12/2013          |                                             |        |     |                                             |
| 113 | Nephrology | India         | Indian Society of<br>Nephrology                             |                                                                  | <a href="http://www.isn-india.com">http://www.isn-india.com</a>     | 21/12/2013          |                                             |        |     |                                             |
| 114 | Nephrology | Indonesia     | The Indonesian Society of<br>Nephrology                     |                                                                  | na                                                                  | 21/12/2013          |                                             |        |     |                                             |
| 115 | Nephrology | International | Kidney Diseases Improving<br>Global Outcomes                |                                                                  | <a href="http://www.kdigo.org/">http://www.kdigo.org/</a>           | 21/12/2013          | hyponatremia/hyponatraemia                  | 3      | 0   |                                             |
| 116 | Nephrology | International | Latin-American Society of<br>Nephrology and<br>Hypertension | Sodiedad Latino-<br>Americana de<br>Nefrologia e<br>Hypertension | <a href="http://www.slanh.org/">http://www.slanh.org/</a>           | 21/12/2013          |                                             |        |     |                                             |
| 117 | Nephrology | International | Panamerican Society for<br>Dialysis & Transplantation       |                                                                  | na                                                                  | 21/12/2013          |                                             |        |     |                                             |
| 118 | Nephrology | International | International Society of<br>Nephrology                      |                                                                  | <a href="http://www.theisn.org">http://www.theisn.org</a>           | 21/12/2013          | hyponatraemia/hyponatremia                  | 13     | 0   |                                             |
| 119 | Nephrology | International | African Association of<br>Nephrology                        |                                                                  | na                                                                  | 21/12/2013          |                                             |        |     |                                             |
| 120 | Nephrology | International | The Asian<br>Pacific Society of Nephrology                  |                                                                  | <a href="http://www.apsneph.org">www.apsneph.org</a>                | 21/12/2013          |                                             |        |     |                                             |
| 121 | Nephrology | Iran          | Iranian Society of<br>Nephrology                            |                                                                  | <a href="http://www.isn-iran.org">http://www.isn-iran.org</a>       | 21/12/2013          | hyponatremia/hyponatraemia/صوديوم ذ<br>الدم | 0      |     |                                             |
| 122 | Nephrology | Ireland       | Irish Nephrology Society                                    | Irish Nephrology<br>Society                                      | <a href="http://www.nephrology.ie">http://www.nephrology.ie</a>     | 21/12/2013          | hyponatremia/hyponatraemia                  | 0      |     |                                             |
| 123 | Nephrology | Israel        | The Israeli Society of<br>Nephrology and<br>Hypertension    |                                                                  | <a href="http://www.isnh.org.il">http://www.isnh.org.il</a>         | 21/12/2013          | hyponatremia/hyponatraemia                  | 0      |     |                                             |
| 124 | Nephrology | Italy         | Italian Society of<br>Nephrology                            | Società Italiana di<br>Nefrologia                                | <a href="http://www.sin-italy.org">http://www.sin-italy.org</a>     | 21/12/2013          |                                             | 0      |     |                                             |
| 125 | Nephrology | Japan         | Japanese Society of<br>Nephrology                           |                                                                  | <a href="http://www.jsn.or.jp">http://www.jsn.or.jp</a>             | 21/12/2013          |                                             |        |     |                                             |
| 126 | Nephrology | Jordan        | Jordanian Society of<br>Nephrology                          |                                                                  |                                                                     | 21/12/2013          |                                             |        |     |                                             |
| 127 | Nephrology | Kazakhstan    | Kazakhstan Nephrology<br>Association                        |                                                                  | na                                                                  | 21/12/2013          |                                             |        |     |                                             |
| 128 | Nephrology | Kenya         | Kenya Renal Association                                     |                                                                  | <a href="http://www.kenyarenal.org/">http://www.kenyarenal.org/</a> | 21/12/2013          |                                             |        |     |                                             |

|     | Field      | Country      | Society/<br>Organisation                                                          | National<br>Name                                               | URL                                                                       | Date Last<br>Search | Search<br>Strategy                       | Titles | CPG | CPG not<br>devoted<br>to hypo-<br>natraemia |
|-----|------------|--------------|-----------------------------------------------------------------------------------|----------------------------------------------------------------|---------------------------------------------------------------------------|---------------------|------------------------------------------|--------|-----|---------------------------------------------|
| 129 | Nephrology | Korea, South | The Korean Society of Nephrology                                                  |                                                                | <a href="http://www.ksn.or.kr/english/">http://www.ksn.or.kr/english/</a> | 21/12/2013          | hyponatraemia/hyponatremia               | 3      | 0   |                                             |
| 130 | Nephrology | Kosovo       | Kosovo Society of Nephrology                                                      |                                                                | na                                                                        | 21/12/2013          |                                          |        |     |                                             |
| 131 | Nephrology | Kuwait       | The Kuwait Nephrology Association                                                 | الكويت جمعية أمراض الكلى                                       | <a href="http://www.kna.org.kw">http://www.kna.org.kw</a>                 | 21/12/2013          |                                          |        |     |                                             |
| 132 | Nephrology | Latvia       | Latvian Nephrologist Association                                                  |                                                                | na                                                                        | 21/12/2013          |                                          |        |     |                                             |
| 133 | Nephrology | Lebanon      | Lebanese Society of Nephrology and Hypertension (LSNH)                            | Societe Libanaise de Nephrologie et d'Hypertension             | <a href="http://www.lsnh-edu.org/">http://www.lsnh-edu.org/</a>           | 21/12/2013          | hyponatremia/hyponatraemia               | 0      |     |                                             |
| 134 | Nephrology | Libya        | Libyan Nephrology and Transplantation Society                                     |                                                                | na                                                                        | 21/12/2013          |                                          |        |     |                                             |
| 135 | Nephrology | Lithuania    | Lithuanian Nephrology, Dialysis and Transplantation Association (LNDTA)           | Lietuvos Nefrologijos, Dializes ir Transplantacijos Asociacija | <a href="http://www.lndta.lt">http://www.lndta.lt</a>                     | 21/12/2013          | hiponatremija/hyponatremia/hyponatraemia | 0      |     |                                             |
| 136 | Nephrology | Macedonia    | Macedonian Society of Nephrology, Dialysis, Transplantation and Artificial Organs |                                                                | na                                                                        | 21/12/2013          |                                          |        |     |                                             |
| 137 | Nephrology | Malaysia     | Malaysian Society of Nephrology                                                   |                                                                | <a href="http://www.msn.org.my">http://www.msn.org.my</a>                 | 21/12/2013          | hyponatraemia/hyponatremia               | 0      |     |                                             |
| 138 | Nephrology | Mexico       | Mexican Society of Nephrology                                                     | Sociedad Mexicana de Nefrologia                                | <a href="http://www.cnm.org.mx">http://www.cnm.org.mx</a>                 | 21/12/2013          |                                          |        |     |                                             |
| 139 | Nephrology | Moldavia     | Moldavian Society of Nephrology and Urology                                       |                                                                | na                                                                        | 21/12/2013          |                                          |        |     |                                             |
| 140 | Nephrology | Mongolia     | Mongolian Society of Nephrology and Urology                                       |                                                                | na                                                                        | 21/12/2013          |                                          |        |     |                                             |
| 141 | Nephrology | Montenegro   | Montenigrin Society of Nephrology                                                 |                                                                | na                                                                        | 21/12/2013          |                                          |        |     |                                             |
| 142 | Nephrology | Morocco      | Maroccan Society of Nephrology                                                    | Societe Marocaine de Nephrologie                               | <a href="http://www.nephro-maroc.org/">http://www.nephro-maroc.org/</a>   | 21/12/2013          |                                          |        |     |                                             |
| 143 | Nephrology | Nicaragua    | Nicaraguan Society of Nephrology                                                  | Sociedad Nicaraguense de Nefrologia                            | na                                                                        | 21/12/2013          |                                          |        |     |                                             |
| 144 | Nephrology | Nigeria      | Nigerian Association of Nephrology                                                |                                                                | <a href="http://www.nanephrology.org/">http://www.nanephrology.org/</a>   | 21/12/2013          |                                          |        |     |                                             |

|     | Field      | Country      | Society/<br>Organisation                              | National<br>Name                                            | URL                                                         | Date Last<br>Search | Search<br>Strategy                        | Titles | CPG | CPG not<br>devoted<br>to hypo-<br>natraemia |
|-----|------------|--------------|-------------------------------------------------------|-------------------------------------------------------------|-------------------------------------------------------------|---------------------|-------------------------------------------|--------|-----|---------------------------------------------|
| 145 | Nephrology | Norway       | Norwegian Society of<br>Nephrology                    | Norsk<br>Nyremedisinsk<br>Forening                          | <a href="http://www.nephro.no">http://www.nephro.no</a>     | 21/12/2013          | hyponatremi/hyponatremia/hyponatraemia    | 0      |     |                                             |
| 146 | Nephrology | Pakistan     | Pakistan Society of<br>Nephrology and Urology         |                                                             | <a href="http://www.psn.com.pk">http://www.psn.com.pk</a>   | 21/12/2013          |                                           |        |     |                                             |
| 147 | Nephrology | Palestine    | Palestine Society of<br>Nephrology                    |                                                             | na                                                          | 21/12/2013          |                                           |        |     |                                             |
| 148 | Nephrology | Panama       | Panama Society of<br>Nephrology                       | Sociedad<br>Panamena de<br>Nefrologia                       | na                                                          | 21/12/2013          |                                           |        |     |                                             |
| 149 | Nephrology | Paraguay     | Paraguay Society of<br>Nephrology                     | Sociedad<br>Paraguaya de<br>Nefrologia                      | na                                                          | 21/12/2013          |                                           |        |     |                                             |
| 150 | Nephrology | Peru         | Peruan Society of<br>Nephrology                       | Sociedad Peruana<br>de Nefrologia                           | <a href="http://www.spn.pe">www.spn.pe</a>                  | 21/12/2013          | hyponatraemia/hyponatremia                | 0      |     |                                             |
| 151 | Nephrology | Peurto Rico  | Puerto Rican Society of<br>Nephrology                 | Sociedad de<br>Nefrologia e<br>Hipertens. de<br>Puerto Rico | na                                                          | 21/12/2013          |                                           |        |     |                                             |
| 152 | Nephrology | Philippines  | Philippine Society of<br>Nephrology                   |                                                             | <a href="http://www.e-psn.com">www.e-psn.com</a>            | 21/12/2013          |                                           |        |     |                                             |
| 153 | Nephrology | Poland       | Polish Society of<br>Nephrology                       | Polskie<br>Towarzystwo<br>Nefrologiczne                     | <a href="http://www.PTNefro.org">http://www.PTNefro.org</a> | 21/12/2013          | hyponatremia/hyponatraemia                | 0      |     |                                             |
| 154 | Nephrology | Portugal     | Portuguese Society of<br>Nephrology                   | Sociedade<br>Portuguesa de<br>Nefrologia                    | <a href="http://www.spnefro.pt/">http://www.spnefro.pt/</a> | 21/12/2013          | hiponatremia/hyponatremia/hyponatraemia   | 0      |     |                                             |
| 155 | Nephrology | Romania      | Romanian Society of<br>Nephrology                     | Societatea Română<br>de Nefrologie                          | <a href="http://www.srnefro.ro/">http://www.srnefro.ro/</a> | 21/12/2013          | hiponatremie/hyponatremia/hyponatraemia   | 0      |     |                                             |
| 156 | Nephrology | Russia       | Scientific Society of<br>Russian Nephrologists        |                                                             | na                                                          | 21/12/2013          |                                           |        |     |                                             |
| 157 | Nephrology | Russia       | Russian Dialysis Society                              | Российское<br>диализное<br>общество                         | <a href="http://www.nephro.ru">http://www.nephro.ru</a>     | 21/12/2013          | гипонатремия/hyponatremia/hyponatraemia   | 0      |     |                                             |
| 158 | Nephrology | Saudi Arabia | Saudi Society of<br>Nephrology and<br>Transplantation |                                                             | <a href="http://www.ssn-sa.com/">http://www.ssn-sa.com/</a> | 21/12/2013          |                                           |        |     |                                             |
| 159 | Nephrology | Serbia       | Serbian Society of<br>Nephrology                      |                                                             | na                                                          | 21/12/2013          |                                           |        |     |                                             |
| 160 | Nephrology | Singapore    | Singapore Society of<br>Nephrology                    |                                                             | <a href="http://www.ssn.org.sg/">http://www.ssn.org.sg/</a> | 21/12/2013          |                                           |        |     |                                             |
| 161 | Nephrology | Slovakia     | Slovak Nephrological<br>Society                       | Slovenskej<br>Nefrologickej<br>Spoločnosti                  | <a href="http://www.nefro.sk">http://www.nefro.sk</a>       | 21/12/2013          | hiponatriemija/hyponatremia/hyponatraemia | 0      |     |                                             |

|     | Field      | Country                 | Society/<br>Organisation                           | National<br>Name                                  | URL                                                                                     | Date Last<br>Search | Search<br>Strategy                        | Titles | CPG | CPG not<br>devoted<br>to hypo-<br>natraemia |
|-----|------------|-------------------------|----------------------------------------------------|---------------------------------------------------|-----------------------------------------------------------------------------------------|---------------------|-------------------------------------------|--------|-----|---------------------------------------------|
| 162 | Nephrology | Slovenia                | Slovenian Society of<br>Nephrology                 | Slovenskega<br>Nefrološkega<br>Društva            | <a href="http://www.nephro-slovenia.si/">http://www.nephro-slovenia.si/</a>             | 21/12/2013          | hiponatriemija/hyponatremia/hyponatraemia | 0      |     |                                             |
| 163 | Nephrology | South Africa            | South African Renal<br>Society                     |                                                   | <a href="http://www.sa-renalsociety.org/">http://www.sa-renalsociety.org/</a>           | 21/12/2013          |                                           |        |     |                                             |
| 164 | Nephrology | Spain                   | Spanish Dialysis and<br>Transplant Society (SEDYT) | Sociedad Española<br>de Diálisis y<br>Trasplante  | <a href="http://www.sedyt.org">http://www.sedyt.org</a>                                 | 21/12/2013          |                                           |        |     |                                             |
| 165 | Nephrology | Spain                   | Spanish Renal Foundation                           | Fundacion<br>espanola de<br>dialysis              | <a href="http://fedialisis.com/">http://fedialisis.com/</a>                             | 21/12/2013          |                                           |        |     |                                             |
| 166 | Nephrology | Spain                   | Spanish Society of<br>Nephrology                   | Sociedad Española<br>de Nefrología                | <a href="http://www.senefro.org">http://www.senefro.org</a>                             | 21/12/2013          | hiponatremia/hyponatremia/hyponatraemia   | 2      | 0   |                                             |
| 167 | Nephrology | Sweden                  | Swedish Society of<br>Nephrology                   | Svensk<br>Njurmedicinsk<br>Förening               | <a href="http://www.njur.se">http://www.njur.se</a>                                     | 21/12/2013          | hyponatremi/hyponatremia/hyponatraemia    | 0      |     |                                             |
| 168 | Nephrology | Switzerland             | Swiss Society of<br>Nephrology                     | Schweizerische<br>Gesellschaft für<br>Nephrologie | <a href="http://www.nephro.ch">http://www.nephro.ch</a>                                 | 21/12/2013          | hyponatremia/hyponatraemia                | 3      | 0   |                                             |
| 169 | Nephrology | Taiwan                  | Taiwan Society of<br>Nephrology                    |                                                   | <a href="http://www.tsn.org.tw/englishVersion">http://www.tsn.org.tw/englishVersion</a> | 21/12/2013          |                                           |        |     |                                             |
| 170 | Nephrology | Tanzania                | Nephrology Society of<br>Tanzania                  |                                                   | <a href="http://www.nesot.org/">http://www.nesot.org/</a>                               | 21/12/2013          |                                           |        |     |                                             |
| 171 | Nephrology | Thailand                | The Nephrology Society of<br>Thailand              |                                                   |                                                                                         | 21/12/2013          |                                           |        |     |                                             |
| 172 | Nephrology | The<br>Netherlands      | Nederlandse Federatie<br>voor Nefrologie           | Dutch Federation<br>of Nephrology                 | <a href="http://www.nefro.nl">http://www.nefro.nl</a>                                   | 21/12/2013          | hyponatriëmie/hyponatremia/hyponatraemia  | 0      |     |                                             |
| 173 | Nephrology | Tunisia                 | Tunisian Nephrological<br>Society                  | Société Tunisienne<br>de Néphrologie              | <a href="http://www.stn-nephro.org/">http://www.stn-nephro.org/</a>                     | 21/12/2013          |                                           |        |     |                                             |
| 174 | Nephrology | Turkey                  | Turkish Society of<br>Nephrology                   | Türk Nefroloji<br>Derneği                         | <a href="http://www.tsn.org.tr">http://www.tsn.org.tr</a>                               | 21/12/2013          | hyponatremi/hyponatremia/hyponatraemia    | 0      |     |                                             |
| 175 | Nephrology | Ukraine                 | Ukrainian Nephrology<br>Association                |                                                   | <a href="http://www.nephrology.kiev.ua">http://www.nephrology.kiev.ua</a>               | 21/12/2013          | гіпонатремія/hyponatremia/hyponatraemia   | 1      | 0   |                                             |
| 176 | Nephrology | United Arab<br>Emirates | Emirates Medical<br>Association Nephrology         |                                                   |                                                                                         | 21/12/2013          |                                           |        |     |                                             |

|     | Field         | Country               | Society/<br>Organisation                                  | National<br>Name                                                 | URL                                                                                 | Date Last<br>Search | Search<br>Strategy                       | Titles | CPG | CPG not<br>devoted<br>to hypo-<br>natraemia |
|-----|---------------|-----------------------|-----------------------------------------------------------|------------------------------------------------------------------|-------------------------------------------------------------------------------------|---------------------|------------------------------------------|--------|-----|---------------------------------------------|
| 177 | Nephrology    | United Kingdom        | The Renal Association                                     | The Renal Association                                            | <a href="http://www.renal.org">http://www.renal.org</a>                             | 21/12/2013          | hyponatremia/hyponatraemia               | 2      | 0   |                                             |
| 178 | Nephrology    | United Kingdom        | Scottish Renal Association                                |                                                                  |                                                                                     | 21/12/2013          |                                          |        |     |                                             |
| 179 | Nephrology    | Uruguay               | Uruguay Society of Nephrology                             | Sociedad Uruguaya de Nefrologia                                  | <a href="http://www.nefrouuguay.com">www.nefrouuguay.com</a>                        | 21/12/2013          |                                          |        |     |                                             |
| 180 | Nephrology    | USA                   | American Society of Nephrology                            | American Society of Nephrology                                   | <a href="http://www.asn-online.org/">http://www.asn-online.org/</a>                 | 21/12/2013          |                                          |        |     |                                             |
| 181 | Nephrology    | Venezuela             | Venezuelan Society of Nephrology                          | Sociedad Venezolana de Nefrologia                                | <a href="http://www.svnefrologia.org/">http://www.svnefrologia.org/</a>             | 21/12/2013          |                                          |        |     |                                             |
| 182 | Endocrinology | Albania               | Albanian Medical Society of Endocrinology and Diabetology |                                                                  | na                                                                                  | 22/12/2013          |                                          |        |     |                                             |
| 183 | Endocrinology | Algeria               | Algerian Society of Endocrinology and Metabolism          |                                                                  | na                                                                                  | 22/12/2013          |                                          |        |     |                                             |
| 184 | Endocrinology | Australia/New Zealand | The Endocrine Society of Australia                        |                                                                  | <a href="http://www.endocrinesociety.org.au">http://www.endocrinesociety.org.au</a> | 22/12/2013          | hyponatraemia/hyponatremia               | 0      |     |                                             |
| 185 | Endocrinology | Austria               | Austrian Society for Endocrinology and Metabolism         | Österreichische Gesellschaft für Endokrinologie und Stoffwechsel | <a href="http://www.oeges.at/">http://www.oeges.at/</a>                             | 22/12/2013          |                                          |        |     |                                             |
| 186 | Endocrinology | Belarus               | Belarusian Association of Endocrinologists                |                                                                  | na                                                                                  | 22/12/2013          |                                          |        |     |                                             |
| 187 | Endocrinology | Belgium               | Belgian Endocrine Society                                 | Belgian Endocrine Society                                        | <a href="http://www.endocrinesociety.be/">http://www.endocrinesociety.be/</a>       | 22/12/2013          | hyponatriëmie/hyponatremia/hyponatraemia |        |     |                                             |
| 188 | Endocrinology | Brazil                | Brazilian Society of Endocrinology and Metabolism         |                                                                  | na                                                                                  | 22/12/2013          |                                          |        |     |                                             |
| 189 | Endocrinology | Bulgaria              | Bulgarian Society of Endocrinology                        |                                                                  | na                                                                                  | 22/12/2013          |                                          |        |     |                                             |
| 190 | Endocrinology | Canada                | Canadian Society of Endocrinology and Metabolism          |                                                                  | <a href="http://www.endo-metab.ca/">http://www.endo-metab.ca/</a>                   | 22/12/2013          |                                          |        |     |                                             |
| 191 | Endocrinology | Croatia               | Croatian Society for Endocrinology                        |                                                                  | na                                                                                  | 22/12/2013          |                                          |        |     |                                             |
| 192 | Endocrinology | Cuba                  | Cuban Society of Endocrinology                            |                                                                  | na                                                                                  | 22/12/2013          |                                          |        |     |                                             |

|     | Field         | Country        | Society/<br>Organisation                                                  | National<br>Name                                                                | URL                                                                              | Date Last<br>Search | Search<br>Strategy                           | Titles | CPG | CPG not<br>devoted<br>to hypo-<br>natraemia |
|-----|---------------|----------------|---------------------------------------------------------------------------|---------------------------------------------------------------------------------|----------------------------------------------------------------------------------|---------------------|----------------------------------------------|--------|-----|---------------------------------------------|
| 193 | Endocrinology | Cyprus         | Cyprus Endocrine Society                                                  |                                                                                 | na                                                                               | 22/12/2013          |                                              |        |     |                                             |
| 194 | Endocrinology | Czech Republic | Czech Endocrine Society<br>Czech Republic                                 | České<br>endokrinologické<br>společnosti ČLS JEP                                | <a href="http://www.endokrinologie.cz/">http://www.endokrinologie.cz/</a>        | 22/12/2013          | hyponatrémie/hyponatremia/hyponatraemia      | 1      | 0   |                                             |
| 195 | Endocrinology | Danmark        | Danish Endocrine Society                                                  | Dansk<br>Endokrinologisk<br>Selskab                                             | <a href="http://www.endocrinology.dk/">http://www.endocrinology.dk/</a>          | 22/12/2013          | hyponatriæmi/hyponatremia/hyponatraemia      | 3      | 0   |                                             |
| 196 | Endocrinology | Egypt          | Egyptian Association of<br>Endocrinology, Diabetes<br>and Atherosclerosis | Egyptian<br>Association of<br>Endocrinology,<br>Diabetes and<br>Atherosclerosis | <a href="http://eaeda.org/">http://eaeda.org/</a>                                | 22/12/2013          | hyponatremia/hyponatraemia                   | 0      |     |                                             |
| 197 | Endocrinology | Estonia        | Estonian Endocrine Society                                                | Eesti<br>Endokrinoloogide<br>Teaduslik Selts                                    | <a href="http://www.ees.ee/">http://www.ees.ee/</a>                              | 22/12/2013          |                                              |        |     |                                             |
| 198 | Endocrinology | Finland        | Finnish Endocrine Society                                                 | Terveysportti                                                                   | <a href="http://www.terveysportti.fi/">http://www.terveysportti.fi/</a>          | 22/12/2013          | hyponatremia/hyponatraemia                   | 50     | 0   |                                             |
| 199 | Endocrinology | France         | French Endocrine Society<br>France                                        | Société Française<br>d'Endocrinologie                                           | <a href="http://www.sfendocrino.org/">http://www.sfendocrino.org/</a>            | 22/12/2013          | hyponatriémie/hyponatremia/hyponatraemia     | 0      |     |                                             |
| 200 | Endocrinology | Georgia        | Georgian Endocrinologists<br>Society Georgia                              |                                                                                 |                                                                                  | 22/12/2013          |                                              |        |     |                                             |
| 201 | Endocrinology | Germany        | German Society for<br>Endocrinology Germany                               | Deutsche<br>Gesellschaft für<br>Endokrinologie                                  | <a href="http://www.endokrinologie.net/">http://www.endokrinologie.net/</a>      | 22/12/2013          | Hyponaträmie/hyponatremia/hyponatraemia      | 3      | 0   |                                             |
| 202 | Endocrinology | Greece         | Hellenic Endocrine Society<br>Greece                                      | ΕΛΛΗΝΙΚΗ<br>ΕΝΔΟΚΡΙΝΟΛΟΓΙΚΗ<br>ΕΤΑΙΡΕΙΑ                                         | <a href="http://www.endo.gr/">http://www.endo.gr/</a>                            | 22/12/2013          | υπονατρίαemia/hyponatremia/hyponatraemia     | 0      |     |                                             |
| 203 | Endocrinology | Hong Kong      | Hong Kong Society of<br>Endocrinology,<br>Metabolism and<br>Reproduction  |                                                                                 | <a href="http://www.endocrine-hk.org">http://www.endocrine-hk.org</a>            | 22/12/2013          |                                              |        |     |                                             |
| 204 | Endocrinology | Hungary        | Hungarian Society of<br>Endocrinology and<br>Metabolism Hungary           | Magyar<br>Endokrinológiai és<br>Anyagcsere<br>Társaság                          | <a href="http://www.endokrinologia.hu/">http://www.endokrinologia.hu/</a>        | 22/12/2013          | hyponatraemia/hyponatremia                   | 0      |     |                                             |
| 205 | Endocrinology | Iceland        | Icelandic Endocrine<br>Society                                            | Félag um<br>innkirtlafræði                                                      | <a href="http://www.innkirtlar.org/">http://www.innkirtlar.org/</a>              | 22/12/2013          | blóðnatríumlækkun/hyponatraemia/hyponatremia | 0      |     |                                             |
| 206 | Endocrinology | India          | Endocrine Society of India                                                |                                                                                 | <a href="http://www.endocrinesocietyindia.org">www.endocrinesocietyindia.org</a> | 22/12/2013          | hyponatraemia/hyponatremia                   | 0      |     |                                             |

|     | Field         | Country       | Society/<br>Organisation                                            | National<br>Name                                            | URL                                                                                                         | Date Last<br>Search | Search<br>Strategy                         | Titles | CPG | CPG not<br>devoted<br>to hypo-<br>natraemia |
|-----|---------------|---------------|---------------------------------------------------------------------|-------------------------------------------------------------|-------------------------------------------------------------------------------------------------------------|---------------------|--------------------------------------------|--------|-----|---------------------------------------------|
| 207 | Endocrinology | Indonesia     | Indonesian Society of Endocrinology                                 | Perkumpulan Endokrinologi Indonesia                         | <a href="http://www.perkeni.org/">http://www.perkeni.org/</a>                                               | 22/12/2013          |                                            |        |     |                                             |
| 208 | Endocrinology | International | International Pan Arab Critical Care Medicine Society               |                                                             | <a href="http://www.ipa-ccms.org/">http://www.ipa-ccms.org/</a>                                             | 22/12/2013          |                                            |        |     |                                             |
| 209 | Endocrinology | Ireland       | Irish Endocrine Society                                             | Irish Endocrine Society                                     | <a href="http://www.irishendocrinesociety.ie/">http://www.irishendocrinesociety.ie/</a>                     | 22/12/2013          | hyponatremia/hyponatraemia                 | 0      |     |                                             |
| 210 | Endocrinology | Israel        | Israel Endocrine Society                                            | Israel Endocrine Society                                    | <a href="http://www.ies.org.il/">http://www.ies.org.il/</a>                                                 | 22/12/2013          | hyponatremia/hyponatraemia                 | 5      | 0   |                                             |
| 211 | Endocrinology | Italy         | Italian Endocrine Society                                           | Societa Italiana di Endocrinologia                          | <a href="http://www.societaitalianadiendocrinologia.it/">http://www.societaitalianadiendocrinologia.it/</a> | 22/12/2013          | ipnatriemia/hyponatremia/hyponatraemia     | 0      |     |                                             |
| 212 | Endocrinology | Italy         | Associazione Medici Endocrinologi                                   | Associazione Medici Endocrinologi                           | <a href="http://www.associazionemediciendocrinologi.it/">http://www.associazionemediciendocrinologi.it/</a> | 22/12/2013          | ipnatriemia/hyponatremia/hyponatraemia     | 0      |     |                                             |
| 213 | Endocrinology | Japan         | The Japan Endocrine Society                                         |                                                             | <a href="http://square.umin.ac.jp/endocrine/english/">http://square.umin.ac.jp/endocrine/english/</a>       | 22/12/2013          |                                            |        |     |                                             |
| 214 | Endocrinology | Jordan        | Jordanian Society of Endocrinology, Diabetes and Metabolic Diseases |                                                             | <a href="http://medicsorg.tripod.com/jsedm.htm">http://medicsorg.tripod.com/jsedm.htm</a>                   | 22/12/2013          |                                            |        |     |                                             |
| 215 | Endocrinology | Kuwait        | The Kuwaity Society of Endocrinology                                |                                                             | <a href="http://www.endoq8.com/">http://www.endoq8.com/</a>                                                 | 22/12/2013          |                                            |        |     |                                             |
| 216 | Endocrinology | Latvia        | Latvian Association of Endocrinology                                | Latvijas Endokrinologu Asociācija                           | <a href="http://www.endokrinologi.lv/">http://www.endokrinologi.lv/</a>                                     | 22/12/2013          | Hiponatriēmija/hyponatremia/hyponatraemia  | 0      |     |                                             |
| 217 | Endocrinology | Lebanon       | Libanes Society of Endocrinology, Diabetes and Lipids               |                                                             | <a href="http://www.edlsociety.org/">http://www.edlsociety.org/</a>                                         | 22/12/2013          |                                            |        |     |                                             |
| 218 | Endocrinology | Libya         | The Libyan Association for Diabetes and Endocrinology Libya         | The Libyan Association for Diabetes and Endocrinology Libya | <a href="http://www.endodiablibya.org/">http://www.endodiablibya.org/</a>                                   | 22/12/2013          | hyponatremia/hyponatraemia/نقص صوديوم الدم | 2      | 0   |                                             |
| 219 | Endocrinology | Lithuania     | Lithuanian Society for Endocrinology                                |                                                             |                                                                                                             | 22/12/2013          |                                            |        |     |                                             |



|     | Field         | Country      | Society/<br>Organisation                                     | National<br>Name                                              | URL                                                                                                                       | Date Last<br>Search | Search<br>Strategy                      | Titles | CPG | CPG not<br>devoted<br>to hypo-<br>natraemia |
|-----|---------------|--------------|--------------------------------------------------------------|---------------------------------------------------------------|---------------------------------------------------------------------------------------------------------------------------|---------------------|-----------------------------------------|--------|-----|---------------------------------------------|
| 220 | Endocrinology | Macedonia    | Macedonian Endocrine Association                             |                                                               | <a href="http://www.endocrinology.org.mk/">http://www.endocrinology.org.mk/</a>                                           | 22/12/2013          |                                         |        |     |                                             |
| 221 | Endocrinology | Malaysia     | Malaysian Endocrine and Metabolic Society                    |                                                               | <a href="http://www.mems.my/">http://www.mems.my/</a>                                                                     | 22/12/2013          | hyponatraemia/hyponatremia              | 0      |     |                                             |
| 222 | Endocrinology | Mexico       | Mexican Society of Nutrition and Endocrinology               | Sociedad Mexicana de Nutrición e Endocrinología               | <a href="http://www.endocrinologia.org.mx/v2/english/index.php">http://www.endocrinologia.org.mx/v2/english/index.php</a> | 22/12/2013          |                                         |        |     |                                             |
| 223 | Endocrinology | Montenegro   | Montenegro, The Endocrinology Association of Montenegro      |                                                               |                                                                                                                           | 22/12/2013          |                                         |        |     |                                             |
| 224 | Endocrinology | Norway       | Norwegian Society of Endocrinology                           |                                                               | <a href="http://www.endocrinology.no/">http://www.endocrinology.no/</a>                                                   | 22/12/2013          |                                         |        |     |                                             |
| 225 | Endocrinology | Pakistan     | Pakistan Endocrine Society                                   |                                                               | <a href="http://www.pakendosociety.org/">http://www.pakendosociety.org/</a>                                               | 22/12/2013          |                                         |        |     |                                             |
| 226 | Endocrinology | Philippines  | Philippine Society of Endocrinology and Metabolism           |                                                               | <a href="http://endo-society.org.ph/">http://endo-society.org.ph/</a>                                                     | 22/12/2013          |                                         |        |     |                                             |
| 227 | Endocrinology | Poland       | Polish Society of Endocrinology                              | Polskie Towarzystwo Endokrynologiczne                         | <a href="http://www.ptendo.org.pl/">http://www.ptendo.org.pl/</a>                                                         | 22/12/2013          | hiponatremia/hyponatremia/hyponatraemia | 3      | 0   |                                             |
| 228 | Endocrinology | Portugal     | Portuguese Society of Endocrinology, Diabetes and Metabolism | Sociedade Portuguesa de Endocrinologia Diabetes e Metabolismo | <a href="http://www.spedm.org/">http://www.spedm.org/</a>                                                                 | 22/12/2013          | hiponatremia/hyponatremia/hyponatraemia | 7      | 0   |                                             |
| 229 | Endocrinology | Romania      | Romanian Psychoneuroendocrine Society                        |                                                               | <a href="http://www.rpnes.ro/">http://www.rpnes.ro/</a>                                                                   | 22/12/2013          |                                         |        |     |                                             |
| 230 | Endocrinology | Romania      | Romanian Society of Endocrinology                            | Societatea Română de Endocrinologie                           | <a href="http://www.sre.ro/">http://www.sre.ro/</a>                                                                       | 22/12/2013          |                                         |        |     |                                             |
| 231 | Endocrinology | Russia       | Russian Association of Endocrinologists                      |                                                               |                                                                                                                           | 22/12/2013          |                                         |        |     |                                             |
| 232 | Endocrinology | Saudi Arabia | Saudi Society of Endocrinology and Metabolism                |                                                               | <a href="http://www.endocrine.org.sa">http://www.endocrine.org.sa</a>                                                     | 22/12/2013          | hyponatraemia/hyponatremia              | 0      |     |                                             |
| 233 | Endocrinology | Serbia       | Serbian Endocrine Society                                    |                                                               |                                                                                                                           | 22/12/2013          |                                         |        |     |                                             |

|     | Field         | Country         | Society/<br>Organisation                                           | National<br>Name                                                | URL                                                                       | Date Last<br>Search | Search<br>Strategy                       | Titles | CPG | CPG not<br>devoted<br>to hypo-<br>natraemia |
|-----|---------------|-----------------|--------------------------------------------------------------------|-----------------------------------------------------------------|---------------------------------------------------------------------------|---------------------|------------------------------------------|--------|-----|---------------------------------------------|
| 234 | Endocrinology | Singapore       | Endocrine and Metabolic Society of Singapore                       |                                                                 | <a href="http://www.emss.com.sg/">http://www.emss.com.sg/</a>             | 22/12/2013          |                                          |        |     |                                             |
| 235 | Endocrinology | Slovakia        | Slovak Endocrine Society                                           | Slovenská endokrinologická spoločnosť                           | <a href="http://www.endo.sk/">http://www.endo.sk/</a>                     | 22/12/2013          |                                          |        |     |                                             |
| 236 | Endocrinology | Slovenia        | Slovenian Endocrine Society                                        |                                                                 |                                                                           | 22/12/2013          | hyponatraemia/hyponatremia               | 59     | 0   |                                             |
| 237 | Endocrinology | South Africa    | Society for Endocrinology, Metabolism and Diabetes of South Africa |                                                                 | <a href="http://www.semDSA.org.za/">http://www.semDSA.org.za/</a>         | 22/12/2013          |                                          |        |     |                                             |
| 238 | Endocrinology | Spain           | Spanish Society of Endocrinology and Nutrition                     |                                                                 | <a href="http://www.seen.es/">http://www.seen.es/</a>                     | 22/12/2013          | hiponatremia/hyponatremia/hyponatraemia  | 23     |     |                                             |
| 239 | Endocrinology | Sweden          | Swedish Endocrine Society                                          |                                                                 |                                                                           | 22/12/2013          |                                          |        |     |                                             |
| 240 | Endocrinology | Switzerland     | Swiss Society of Endocrinology and Diabetes                        | Schweizerische Gesellschaft für Endokrinologie und Diabetologie | <a href="http://www.sgeds.ch/">http://www.sgeds.ch/</a>                   | 22/12/2013          | Hyponatriämie/hyponatremia/hyponatraemia | 0      |     |                                             |
| 241 | Endocrinology | The Netherlands | Netherlands Society for Endocrinology                              | Nederlandse Vereniging voor Endocrinologie                      | <a href="http://www.nve.nl">http://www.nve.nl</a>                         | 22/12/2013          | hyponatiëmie/hyponatremia/hyponatraemia  | 2      | 0   |                                             |
| 242 | Endocrinology | Tunisia         | Tunisian Society of Endocrinology                                  |                                                                 |                                                                           | 22/12/2013          |                                          |        |     |                                             |
| 243 | Endocrinology | Turkey          | Turkey Society of Endocrinology and Metabolism                     |                                                                 |                                                                           | 22/12/2013          |                                          |        |     |                                             |
| 244 | Endocrinology | Ukraine         | Association of Endocrinologists of the Ukraine                     |                                                                 | <a href="http://iem.kiev.ua/">http://iem.kiev.ua/</a>                     | 22/12/2013          | гіпонатремія/hyponatremia/hyponatraemia  | 0      |     |                                             |
| 245 | Endocrinology | United Kingdom  | Society for Endocrinology                                          | Society for Endocrinology                                       | <a href="http://www.endocrinology.org/">http://www.endocrinology.org/</a> | 22/12/2013          |                                          |        |     |                                             |
| 246 | Endocrinology | Uruguay         | Uruguayan Society of Endocrinology and Metabolism                  |                                                                 | <a href="http://www.endosuem.org.uy/">http://www.endosuem.org.uy/</a>     | 22/12/2013          |                                          |        |     |                                             |
| 247 | Endocrinology | USA             | The Endocrine Society                                              |                                                                 | <a href="https://www.endocrine.org/">https://www.endocrine.org/</a>       | 22/12/2013          | hyponatraemia/hyponatremia               | 19     | 0   |                                             |
| 248 | Endocrinology | USA             | American Association of Clinical Endocrinologists                  |                                                                 | <a href="https://www.aace.com/">https://www.aace.com/</a>                 | 22/12/2013          | hyponatraemia/hyponatremia               | 4      | 0   |                                             |

|     | Field                   | Country                | Society/<br>Organisation                                                     | National<br>Name                                                                     | URL                                                                                       | Date Last<br>Search | Search<br>Strategy                       | Titles | CPG | CPG not<br>devoted<br>to hypo-<br>natraemia |
|-----|-------------------------|------------------------|------------------------------------------------------------------------------|--------------------------------------------------------------------------------------|-------------------------------------------------------------------------------------------|---------------------|------------------------------------------|--------|-----|---------------------------------------------|
| 249 | Endocrinology           | Venezuela              | Venezuelan Society of Endocrinology and Metabolism                           |                                                                                      | na                                                                                        | 22/12/2013          |                                          |        |     |                                             |
| 250 | Intensive Care Medicine | Albania                | Albanian Society of Anaesthesia and Intensive Care                           |                                                                                      | na                                                                                        | 22/12/2013          |                                          |        |     |                                             |
| 251 | Intensive Care Medicine | Argentina              | Argentinian Society of Intensive Care                                        | Sociedad Argentina de Terapia Intensiva                                              | <a href="http://www.sati.org.ar/">http://www.sati.org.ar/</a>                             | 22/12/2013          | hyponatremia/hyponatraemia               | 0      |     |                                             |
| 252 | Intensive Care Medicine | Armenia                | Armenian Society of Anaesthesiologists and Intensive Care Specialists        |                                                                                      | <a href="http://freenet.am/~armanest/index.htm">http://freenet.am/~armanest/index.htm</a> | 22/12/2013          |                                          |        |     |                                             |
| 253 | Intensive Care Medicine | Australia/New Zealand  | Australian & New Zealand Intensive Care Society                              | Australian & New Zealand Intensive Care Society                                      | <a href="http://www.anzics.com.au/">http://www.anzics.com.au/</a>                         | 22/12/2013          | hyponatremia/hyponatraemia               | 0      |     |                                             |
| 254 | Intensive Care Medicine | Austria                | Austrian Society for Anesthesiology, Reanimation and Intensive Care Medicine | Österreichische Gesellschaft für Anesthesiologie, Reanimation und Intensivmedizin    | <a href="http://www.oegari.at/">http://www.oegari.at/</a>                                 | 22/12/2013          |                                          | 0      |     |                                             |
| 255 | Intensive Care Medicine | Bangladesh             | Bangladesh Society of Critical Care Medicine                                 | Bangladesh Society of Critical Care Medicine                                         | <a href="http://www.bsccm.net/">http://www.bsccm.net/</a>                                 | 22/12/2013          | hyponatremia/hyponatraemia               | 0      |     |                                             |
| 256 | Intensive Care Medicine | Belarus                | BALARUS - Belarusian Society of Anaethetists and Experts in Resuscitation    |                                                                                      | <a href="http://www.baics.org/">http://www.baics.org/</a>                                 | 22/12/2013          |                                          |        |     |                                             |
| 257 | Intensive Care Medicine | Belgium                | Belgian Society of Intensive Care & Emergency Medicine                       | Belgische Vereniging voor Intensieve Geneeskunde/Société belge de Médecine Intensive | <a href="http://www.siz.be/">http://www.siz.be/</a>                                       | 22/12/2013          | hyponatriëmie/hyponatremia/hyponatraemia | 0      |     |                                             |
| 258 | Intensive Care Medicine | Belize                 | Belize Critical Care Society                                                 |                                                                                      | na                                                                                        | 22/12/2013          |                                          | 0      |     |                                             |
| 259 | Intensive Care Medicine | Bolivia                | Bolivian Society of Critical Medicine and Intensive Therapy                  | Sociedad Boliviana de Medicina Crítica Y Terapia Intensiva                           | na                                                                                        | 22/12/2013          |                                          | 0      |     |                                             |
| 260 | Intensive Care Medicine | Bosnia and Herzegovina | Society of Intensive Care Medicine of Bosnia-Herzegovina                     |                                                                                      | na                                                                                        | 22/12/2013          |                                          |        |     |                                             |

|     | Field                         | Country           | Society/<br>Organisation                                                                                                          | National<br>Name                                                           | URL                                                                                       | Date Last<br>Search | Search<br>Strategy                      | Titles | CPG | CPG not<br>devoted<br>to hypo-<br>natraemia |
|-----|-------------------------------|-------------------|-----------------------------------------------------------------------------------------------------------------------------------|----------------------------------------------------------------------------|-------------------------------------------------------------------------------------------|---------------------|-----------------------------------------|--------|-----|---------------------------------------------|
| 261 | Intensive<br>Care<br>Medicine | Brazil            | Brazilian Association of<br>Intensive Care Medicine                                                                               | Asociacao de<br>Medicina Intensiva<br>Brasileira                           | <a href="http://www.amib.org.br/">http://www.amib.org.br/</a>                             | 22/12/2013          | hyponatremia/hiponatremia               | 0      |     |                                             |
| 262 | Intensive<br>Care<br>Medicine | Canada            | Canadian Critical Care<br>Society                                                                                                 | Canadian Critical<br>Care Society                                          | <a href="http://www.canadiancriticalcare.org/">http://www.canadiancriticalcare.org/</a>   | 22/12/2013          | hyponatremia/hyponatraemia              | 0      |     |                                             |
| 263 | Intensive<br>Care<br>Medicine | Chile             | Chilean Society of<br>Intensive Care Medicine                                                                                     | Sociedad Chilena<br>de Medicina<br>Intensiva                               | <a href="http://www.medicina-intensiva.cl/web/">http://www.medicina-intensiva.cl/web/</a> | 22/12/2013          |                                         | 0      |     |                                             |
| 264 | Intensive<br>Care<br>Medicine | China             | Chinese Society of Critical<br>Care Medicine                                                                                      |                                                                            | na                                                                                        | 22/12/2013          |                                         | 0      |     |                                             |
| 265 | Intensive<br>Care<br>Medicine | China             | Society of Critical Care<br>Medicine of the Chinese<br>Association of Integration<br>of Traditional Medicine &<br>Modern Medicine |                                                                            | na                                                                                        | 22/12/2013          |                                         | 0      |     |                                             |
| 266 | Intensive<br>Care<br>Medicine | Colombia          | Colombian Association of<br>Critical Medicine and<br>Intensive Care                                                               | Asociacion<br>Colombiana de<br>Medicina Critica y<br>Cuidado Intensivo     | <a href="http://www.amci.org.co">http://www.amci.org.co</a>                               | 22/12/2013          | hyponatrémie/hyponatremia/hyponatraemia | 0      |     |                                             |
| 267 | Intensive<br>Care<br>Medicine | Costa Rica        | Costa Rican Society of<br>Intensive Care Medicine                                                                                 | Asociacion de<br>Medicina Intensiva<br>de Costa Rica                       | na                                                                                        | 22/12/2013          |                                         | 0      |     |                                             |
| 268 | Intensive<br>Care<br>Medicine | Croatia           | Croatian Society for<br>Emergency and Medical<br>Intensive Care Medicine                                                          | Hrvatsko društvo<br>za hitnu i<br>internističku<br>intenzivnu<br>medicinu  | <a href="http://www.hdhiim.org/">http://www.hdhiim.org/</a>                               | 22/12/2013          |                                         |        |     |                                             |
| 269 | Intensive<br>Care<br>Medicine | Czech<br>Republic | Czech Society of<br>Anesthesiology & Intensive<br>Care Medicine                                                                   | Ceska spolecnost<br>anesthesiologie<br>resisitace a<br>intenzivni mediciny | <a href="http://www.csarim.cz/">http://www.csarim.cz/</a>                                 | 22/12/2013          | hyponatrémie/hyponatremia/hyponatraemia | 5      | 0   |                                             |
| 270 | Intensive<br>Care<br>Medicine | Czech<br>Republic | Czech Society of Intensive<br>Care Medicine                                                                                       | Česka společnost<br>intenzivní medicíny                                    | <a href="http://www.csim.cz/">http://www.csim.cz/</a>                                     | 22/12/2013          | hyponatrémie/hyponatremia/hyponatraemia | 5      | 0   |                                             |
| 271 | Intensive<br>Care<br>Medicine | Danmark           | Danish Society of Intensive<br>Care Therapy                                                                                       |                                                                            | <a href="http://www.dsit.dk/">http://www.dsit.dk/</a>                                     | 22/12/2013          |                                         |        |     |                                             |
| 272 | Intensive<br>Care<br>Medicine | Denmark           | Danish Society of<br>Anaesthesiology and<br>Intensive Care Medicine                                                               | Dansk Selskab for<br>Anæstesiologi og<br>Intensiv Medicin                  | <a href="http://www.dasaim.dk">http://www.dasaim.dk</a>                                   | 22/12/2013          |                                         |        |     |                                             |

|     | Field                         | Country   | Society/<br>Organisation                                             | National<br>Name                                                    | URL                                                             | Date Last<br>Search | Search<br>Strategy                       | Titles | CPG | CPG not<br>devoted<br>to hypo-<br>natraemia |
|-----|-------------------------------|-----------|----------------------------------------------------------------------|---------------------------------------------------------------------|-----------------------------------------------------------------|---------------------|------------------------------------------|--------|-----|---------------------------------------------|
| 273 | Intensive<br>Care<br>Medicine | Egypt     | Egyptian Society of Critical<br>Care and Emergency                   |                                                                     | na                                                              | 22/12/2013          |                                          | 0      |     |                                             |
| 274 | Intensive<br>Care<br>Medicine | Equador   | Equatorian Society of<br>Anaesthesiology and<br>Critical Medicine    | Sociedad<br>Ecuatoriana de<br>Medicina Critica                      | na                                                              | 22/12/2013          |                                          | 0      |     |                                             |
| 275 | Intensive<br>Care<br>Medicine | Estonia   | Estonian Society of<br>Anaesthesiologists                            |                                                                     | <a href="http://www.anest.ee/">http://www.anest.ee/</a>         | 22/12/2013          |                                          |        |     |                                             |
| 276 | Intensive<br>Care<br>Medicine | Finland   | Finnish Society of Intensive<br>Care                                 | Finnish Society of<br>Intensive Care                                | <a href="http://www.fimnet.fi/">http://www.fimnet.fi/</a>       | 22/12/2013          | hyponatremia/hyponatraemia               | 0      |     |                                             |
| 277 | Intensive<br>Care<br>Medicine | France    | French Speaking Society of<br>Reanimation                            | Societe de<br>Reanimation de<br>Langue Francaise                    | <a href="http://www.srlf.org/">http://www.srlf.org/</a>         | 22/12/2013          | hyponatremie/hyponatremia/hyponatraemia  | 113    | 0   |                                             |
| 278 | Intensive<br>Care<br>Medicine | Georgia   | Georgian Society of<br>Anesthesiology and Critical<br>Care Medicine  |                                                                     | <a href="http://www.gsacm.ge/">http://www.gsacm.ge/</a>         | 22/12/2013          | hyponatremia/hyponatraemia               | 0      |     |                                             |
| 279 | Intensive<br>Care<br>Medicine | Georgia   | Association of Catastrophe<br>& Critical Care Medicine of<br>Georgia |                                                                     |                                                                 | 22/12/2013          |                                          | 0      |     |                                             |
| 280 | Intensive<br>Care<br>Medicine | Germany   | German Interdisciplinary<br>Society of Intensive Care<br>Medicine    | Deutsche<br>Interdisziplinare<br>Vereinigung fur<br>Intensivmedizin | <a href="http://www.divi-org.de/">http://www.divi-org.de/</a>   | 22/12/2013          | Hyponatriämie/hyponatremia/hyponatraemia | 0      |     |                                             |
| 281 | Intensive<br>Care<br>Medicine | Greece    | Greek Society of Intensive<br>Care                                   | ΕΛΛΗΝΙΚΗ<br>ΕΤΑΙΡΕΙΑ<br>ΕΝΤΑΤΙΚΗΣ<br>ΘΕΡΑΠΕΙΑΣ                      | <a href="http://www.icu.gr/">http://www.icu.gr/</a>             | 22/12/2013          | υπονατριάμια/hyponatremia/hyponatraemia  | 0      |     |                                             |
| 282 | Intensive<br>Care<br>Medicine | Hong Kong | Hong Kong Society of<br>Critical Care Medicine                       |                                                                     | <a href="http://www.hkscm.org/">http://www.hkscm.org/</a>       | 22/12/2013          |                                          | 0      |     |                                             |
| 283 | Intensive<br>Care<br>Medicine | Hungary   | Hungarian Society of<br>Anaesthesiology and<br>Intensive Therapy     | Magyar<br>Aneszteziológiai és<br>Intenzív Terápiás<br>Társaság      | <a href="http://www.anesztinfo.hu">http://www.anesztinfo.hu</a> | 22/12/2013          | hyponatraemia/hyponatremia               | 1      | 0   |                                             |
| 284 | Intensive<br>Care<br>Medicine | India     | Indian Society of Critical<br>Care Medicine                          | Indian Society of<br>Critical Care<br>Medicine                      | <a href="http://www.isccm.org/">http://www.isccm.org/</a>       | 22/12/2013          | hyponatremia/hyponatraemia               | 6      | 0   |                                             |
| 285 | Intensive<br>Care<br>Medicine | India     | National Association of<br>Critical Care Medicine                    |                                                                     | na                                                              | 22/12/2013          |                                          | 0      |     |                                             |

|     | Field                         | Country      | Society/<br>Organisation                                                          | National<br>Name                                                                      | URL                                                           | Date Last<br>Search | Search<br>Strategy                      | Titles | CPG | CPG not<br>devoted<br>to hypo-<br>natraemia |
|-----|-------------------------------|--------------|-----------------------------------------------------------------------------------|---------------------------------------------------------------------------------------|---------------------------------------------------------------|---------------------|-----------------------------------------|--------|-----|---------------------------------------------|
| 286 | Intensive<br>Care<br>Medicine | Indonesia    | Indonesian Society of<br>Critical Care Medicine                                   | Perhimpunan<br>Dokter Intensive<br>Care Indonesia                                     | <a href="http://www.perdici.org/">http://www.perdici.org/</a> | 22/12/2013          | hiponatremia/hyponatremia/hyponatraemia | 0      |     |                                             |
| 287 | Intensive<br>Care<br>Medicine | Ireland      | Intensive Care Society of<br>Ireland                                              | Intensive Care<br>Society of Ireland                                                  | <a href="http://www.icmed.com/">http://www.icmed.com/</a>     | 22/12/2013          | hyponatremia/hyponatraemia              | 0      |     |                                             |
| 288 | Intensive<br>Care<br>Medicine | Israel       | Israel Society of Critical<br>Care Medicine                                       |                                                                                       | na                                                            | 22/12/2013          |                                         | 0      |     |                                             |
| 289 | Intensive<br>Care<br>Medicine | Italy        | Italian Society of Intensive<br>Care                                              | Societa Italiana di<br>Terapia Intensiva                                              | na                                                            | 22/12/2013          |                                         | 0      |     |                                             |
| 290 | Intensive<br>Care<br>Medicine | Italy        | Italian Society of<br>Aneastthesia Analgesia<br>Reanimation and Intensive<br>Care | Società Italiana di<br>Anestesia<br>Analgesia<br>Rianimazione e<br>Therapia Intensiva | <a href="http://www.siaarti.it">http://www.siaarti.it</a>     | 22/12/2013          | hiponatremia/hyponatremia/hyponatraemia | 0      |     |                                             |
| 291 | Intensive<br>Care<br>Medicine | Japan        | Japanese Society of<br>Intensive Care Medicine                                    |                                                                                       | <a href="http://www.jsicm.org">http://www.jsicm.org</a>       | 22/12/2013          | 低ナトリウム血症/hyponatremia/hyponatraemia     | 29     | 0   |                                             |
| 292 | Intensive<br>Care<br>Medicine | Korea, South | Korean Society of Critical<br>Care Medicine                                       |                                                                                       | <a href="http://www.kscem.org">http://www.kscem.org</a>       | 22/12/2013          | hyponatremia/hyponatraemia              | 0      |     |                                             |
| 293 | Intensive<br>Care<br>Medicine | Korea, South | Korean Society of Critical<br>Care Medicine                                       |                                                                                       | na                                                            | 22/12/2013          |                                         |        |     |                                             |
| 294 | Intensive<br>Care<br>Medicine | Kosovo       | Association of Kosovar<br>Anaesthesiologists                                      |                                                                                       | na                                                            | 22/12/2013          |                                         |        |     |                                             |
| 295 | Intensive<br>Care<br>Medicine | Kuwait       | Kuwait Society of Intensive<br>Care                                               |                                                                                       |                                                               | 22/12/2013          |                                         |        |     |                                             |
| 296 | Intensive<br>Care<br>Medicine | Latvia       | Latvian Society of<br>Intensive Care &<br>Emergency Medicine                      |                                                                                       | na                                                            | 22/12/2013          |                                         | 0      |     |                                             |
| 297 | Intensive<br>Care<br>Medicine | Lebanon      | Lebanese Society of<br>Critical Care                                              |                                                                                       | na                                                            | 22/12/2013          |                                         | 0      |     |                                             |
| 298 | Intensive<br>Care<br>Medicine | Libya        | Libyan Society of<br>Anaesthesia, Intensive<br>Care and Resuscitation             |                                                                                       | na                                                            | 22/12/2013          |                                         |        |     |                                             |
| 299 | Intensive<br>Care<br>Medicine | Lithuania    | Lithuanian Society of<br>Anaesthesiology &<br>Intensive Care                      | Lietuvos<br>Anesteziologų –<br>Reanimatologų<br>draugija                              | <a href="http://anest-rean.lt/">http://anest-rean.lt/</a>     | 22/12/2013          |                                         |        |     |                                             |

|     | Field                         | Country     | Society/<br>Organisation                                      | National<br>Name                                           | URL                                                               | Date Last<br>Search | Search<br>Strategy         | Titles | CPG | CPG not<br>devoted<br>to hypo-<br>natraemia |
|-----|-------------------------------|-------------|---------------------------------------------------------------|------------------------------------------------------------|-------------------------------------------------------------------|---------------------|----------------------------|--------|-----|---------------------------------------------|
| 300 | Intensive<br>Care<br>Medicine | Macedonia   | Macedonian Society of<br>Anesthesia & Intensive<br>Care       | Macedonian<br>Society of<br>Anesthesia &<br>Intensive Care | <a href="http://www.msa.org.mk/">http://www.msa.org.mk/</a>       | 22/12/2013          | hyponatremia/hyponatraemia | 0      |     |                                             |
| 301 | Intensive<br>Care<br>Medicine | Malaysia    | Malaysian Society of<br>Intensive Care                        |                                                            | na                                                                | 22/12/2013          |                            | 0      |     |                                             |
| 302 | Intensive<br>Care<br>Medicine | Mexico      | Mexican College of Critical<br>Medicine                       | Colegio Mexicano<br>de Medicina Critica                    | <a href="http://www.commec.org.mx/">http://www.commec.org.mx/</a> | 22/12/2013          |                            | 0      |     |                                             |
| 303 | Intensive<br>Care<br>Medicine | Mongolia    | Mongolian Society of<br>Anaesthesiology and<br>Intensive Care |                                                            | na                                                                | 22/12/2013          |                            | 0      |     |                                             |
| 304 | Intensive<br>Care<br>Medicine | Morocco     | Maroccan Society of<br>Anaesthesiology and<br>Intensice Care  | Soieté Marocaine<br>d'Anesthésie et de<br>Réanimation      | <a href="http://www.smar.ma">http://www.smar.ma</a>               | 22/12/2013          |                            |        |     |                                             |
| 305 | Intensive<br>Care<br>Medicine | Norway      | Norway Society of<br>Anesthiology                             | Norsk<br>Anestesiologisk<br>Forening                       | <a href="http://legeforeningen.no">http://legeforeningen.no</a>   | 22/12/2013          |                            | 0      |     |                                             |
| 306 | Intensive<br>Care<br>Medicine | Pakistan    | Pakistan Society of<br>Intensive Care                         |                                                            | na                                                                | 22/12/2013          |                            | 0      |     |                                             |
| 307 | Intensive<br>Care<br>Medicine | Panama      | Panama Association<br>Critical Medicine and Care              | Asociacion<br>Panamena de<br>Medicina Critica y<br>Terapia | na                                                                | 22/12/2013          |                            | 0      |     |                                             |
| 308 | Intensive<br>Care<br>Medicine | Peru        | Peruvian Society of<br>Intensive Care                         | Sociedad Peruana<br>de Medicina<br>Intensiva               | na                                                                | 22/12/2013          |                            | 0      |     |                                             |
| 309 | Intensive<br>Care<br>Medicine | Philippines | Philippine Society of<br>Anesthesiologists                    |                                                            | <a href="http://www.psa-ph.org/">http://www.psa-ph.org/</a>       | 22/12/2013          | hyponatremia/hyponatraemia | 0      |     |                                             |
| 310 | Intensive<br>Care<br>Medicine | Philippines | Philippine Society of<br>Critical Care Medicine               |                                                            | na                                                                | 22/12/2013          |                            | 0      |     |                                             |
| 311 | Intensive<br>Care<br>Medicine | Poland      | Polish Society of<br>Anaesthesiology &<br>Intensive Care      |                                                            | <a href="http://www.ptaiit.org/">http://www.ptaiit.org/</a>       | 22/12/2013          |                            |        |     |                                             |
| 312 | Intensive<br>Care<br>Medicine | Portugal    | Portugese Society of<br>Intensive Care                        | Sociedade<br>Portuguesa de<br>Cuidados<br>Intensivos       | na                                                                | 22/12/2013          |                            | 0      |     |                                             |
| 313 | Intensive<br>Care<br>Medicine | Romania     | Romanean Society of<br>Anesthesiology and<br>Intensive Care   | Societatea Romana<br>de Anestezie-<br>Terapie Intensiva    | <a href="http://www.srati.ro/">http://www.srati.ro/</a>           | 22/12/2013          | hyponatremia/hyponatraemia | 0      |     |                                             |

|     | Field                         | Country            | Society/<br>Organisation                                                      | National<br>Name                                                                   | URL                                                                                   | Date Last<br>Search | Search<br>Strategy                        | Titles | CPG | CPG not<br>devoted<br>to hypo-<br>natraemia |
|-----|-------------------------------|--------------------|-------------------------------------------------------------------------------|------------------------------------------------------------------------------------|---------------------------------------------------------------------------------------|---------------------|-------------------------------------------|--------|-----|---------------------------------------------|
| 314 | Intensive<br>Care<br>Medicine | Russia             | Society of<br>Anaesthesiologists and<br>reanimatologists of Central<br>Russia |                                                                                    | na                                                                                    | 22/12/2013          |                                           | 0      |     |                                             |
| 315 | Intensive<br>Care<br>Medicine | Saudi Arabia       | Saudi Critical Care Society                                                   |                                                                                    | na                                                                                    | 22/12/2013          |                                           | 0      |     |                                             |
| 316 | Intensive<br>Care<br>Medicine | Saudi Arabia       | Seudi Society of Internal<br>Medicine                                         |                                                                                    | <a href="http://ssim.kau.edu.sa">http://ssim.kau.edu.sa</a>                           | 22/12/2013          |                                           |        |     |                                             |
| 317 | Intensive<br>Care<br>Medicine | Serbia             | Serbian Society of<br>Intensive Care Medicine                                 |                                                                                    |                                                                                       | 22/12/2013          |                                           |        |     |                                             |
| 318 | Intensive<br>Care<br>Medicine | Singapore          | Society of Intensive Care<br>Medicine                                         |                                                                                    | na                                                                                    | 22/12/2013          |                                           | 0      |     |                                             |
| 319 | Intensive<br>Care<br>Medicine | Slovakia           | Slovak Society of<br>Anesthesia & Intensive<br>Care Medicine                  |                                                                                    | <a href="http://www.ssaim.sk/">http://www.ssaim.sk/</a>                               | 22/12/2013          |                                           | 0      |     |                                             |
| 320 | Intensive<br>Care<br>Medicine | Slovenia           | Slovenian Society of<br>Intensive Care Medicine                               | Slovensko<br>Združenje za<br>Intenzivno Medico                                     | <a href="http://www.szim.si/">http://www.szim.si/</a>                                 | 22/12/2013          | hiponatriemija/hyponatremia/hyponatraemia | 0      |     |                                             |
| 321 | Intensive<br>Care<br>Medicine | South Africa       | Critical Care Society of<br>Southern Africa                                   |                                                                                    | na                                                                                    | 22/12/2013          |                                           | 0      |     |                                             |
| 322 | Intensive<br>Care<br>Medicine | Spain              | Spanish Society Intensive<br>Care Medicine                                    | Sociedad Espanola<br>de Medicina<br>Intensiva, Critica y<br>Unidades<br>Coronarias | <a href="http://www.semicyuc.org/">http://www.semicyuc.org/</a>                       | 22/12/2013          | hiponatremia/hyponatremia/hyponatraemia   | 0      |     |                                             |
| 323 | Intensive<br>Care<br>Medicine | Sudan              | Sudan Society of<br>Anesthesiologists                                         |                                                                                    | na                                                                                    | 22/12/2013          |                                           | 0      |     |                                             |
| 324 | Intensive<br>Care<br>Medicine | Sweden             | Swedish Society of<br>Anesthesiology and<br>Intensive Care                    | Svensk Forening<br>for Anestesi och<br>Intensivvard                                | <a href="http://www.sfai.se/">http://www.sfai.se/</a>                                 | 22/12/2013          | hyponatremi/hyponatremia/hyponatraemia    | 3      | 0   |                                             |
| 325 | Intensive<br>Care<br>Medicine | Switzerland        | Swiss Society of Intensive<br>Care Medicine                                   | Societe Suisse de<br>Medecine<br>Intensive                                         | <a href="http://www.swiss-icu.ch/">http://www.swiss-icu.ch/</a>                       | 22/12/2013          | Hyponaträmie/hyponatremia/hyponatraemia   | 0      |     |                                             |
| 326 | Intensive<br>Care<br>Medicine | Taiwan             | Society of Emergency and<br>Critical Care Medicine                            |                                                                                    | <a href="http://www.seccm.org.tw/English.asp">http://www.seccm.org.tw/English.asp</a> | 22/12/2013          |                                           |        |     |                                             |
| 327 | Intensive<br>Care<br>Medicine | The<br>Netherlands | Dutch Society of Intensive<br>Care                                            | Nederlands<br>Vereniging vor<br>Intensive Care                                     | <a href="http://nvic.nl">http://nvic.nl</a>                                           | 22/12/2013          | hyponatriëmie/hyponatremia/hyponatraemia  | 0      |     |                                             |



| Field | Country                       | Society/<br>Organisation | National<br>Name                                                      | URL                                                                       | Date Last<br>Search                                                                             | Search<br>Strategy | Titles                                           | CPG | CPG not<br>devoted<br>to hypo-<br>natraemia |
|-------|-------------------------------|--------------------------|-----------------------------------------------------------------------|---------------------------------------------------------------------------|-------------------------------------------------------------------------------------------------|--------------------|--------------------------------------------------|-----|---------------------------------------------|
| 328   | Intensive<br>Care<br>Medicine | Tunisia                  | Société Tunisienne<br>d'Anesthésie et de<br>Réanimation               |                                                                           | <a href="http://www.staartunisie.org/home.php">http://www.staartunisie.org/home.php</a>         | 22/12/2013         | hyponatriémie/hyponatremia/hyponatraemia         | 0   |                                             |
| 329   | Intensive<br>Care<br>Medicine | Turkey                   | Turkish Society of Medical<br>and Surgical Intensive Care<br>Medicine | Türk Dahili ve<br>Cerrahi Bilimler                                        | <a href="http://www.dcyogunbakim.org.tr/">http://www.dcyogunbakim.org.tr/</a>                   | 22/12/2013         |                                                  | 0   |                                             |
| 330   | Intensive<br>Care<br>Medicine | Ukraine                  | Ukrainian Society of<br>Anaesthesiologists                            | АКОЦІАЦІЯ<br>АНЕСТЕЗІОЛОГІВ<br>УКРАЇНИ                                    | <a href="http://www.aay.org.ua">http://www.aay.org.ua</a>                                       | 22/12/2013         |                                                  |     |                                             |
| 331   | Intensive<br>Care<br>Medicine | United<br>Kingdom        | The Intensive Care Society                                            | The Intensive Care<br>Society                                             | <a href="http://www.ics.ac.uk/">http://www.ics.ac.uk/</a>                                       | 22/12/2013         | hyponatremia/hyponatraemia                       | 3   | 0                                           |
| 332   | Intensive<br>Care<br>Medicine | United<br>Kingdom        | Scottish Intensive Care<br>Society                                    |                                                                           | <a href="http://www.scottishintensivecare.org.uk/">http://www.scottishintensivecare.org.uk/</a> | 22/12/2013         |                                                  |     |                                             |
| 333   | Intensive<br>Care<br>Medicine | Uruguay                  | Uruguay Society of<br>Intensive Care Medicine                         | Sociedad Uruguaya<br>de Medicina<br>Intensiva                             | <a href="http://www.sumi.org.uy">http://www.sumi.org.uy</a>                                     | 22/12/2013         |                                                  | 0   |                                             |
| 334   | Intensive<br>Care<br>Medicine | USA                      | Society of Critical Care<br>Medicine                                  | Society of Critical<br>Care Medicine                                      | <a href="http://www.sccm.org">http://www.sccm.org</a>                                           | 22/12/2013         | hyponatremia                                     | 2   | 0                                           |
| 335   | Intensive<br>Care<br>Medicine | Venezuela                | Venezuelan Society of<br>Critical Medicine                            | Sociedad<br>Venezolana de<br>Medicina Critica                             | <a href="http://www.svmc.com.ve/">http://www.svmc.com.ve/</a>                                   | 22/12/2013         |                                                  | 0   |                                             |
| 336   | Intensive<br>Care<br>Medicine |                          | Slovenian Society of<br>Anaesthesiology<br>and Intensive Care         | Slovensko<br>združenje za<br>anesteziologijo in<br>intenzivno<br>medicino | <a href="http://www.szaim.org">http://www.szaim.org</a>                                         | 22/12/2013         |                                                  |     |                                             |
| 337   | Intensive<br>Care<br>Medicine |                          | Jordan Society of<br>Anaesthesia and Intensive<br>Care                |                                                                           | <a href="http://www.jsaic.org/">http://www.jsaic.org/</a>                                       | 22/12/2013         |                                                  |     |                                             |
| 338   | not<br>applicable             | not applicable           | -                                                                     | -                                                                         | <a href="http://www.google.com">www.google.com</a>                                              | 23/12/2013         | (Hyponatraemia OR hyponatremia) AND<br>Guideline | 100 | 1                                           |
