# Supplementary material for: Diagnosis and treatment of hyponatremia: a systematic review of clinical practice guidelines and consensus statements
Source: Springer Nature journal article supplement (doi:10.1186/s12916-014-0231-1), 2014-12-01
Supplement: MOESM2 [file 9758612]

## Additional file 2: Table S2. Data Extraction Template

| Item                                         | Entry |
|----------------------------------------------|-------|
| Guideline Id                                 |       |
| Guideline Organisation/society=<br>Developer |       |
| Name of guideline or consensus statement     |       |
| Year of publication                          |       |
| Funding source                               |       |
| Country                                      |       |
| Target population                            |       |
| Definition of hyponatraemia                  |       |
| Target Users                                 |       |
| Guideline writers                            |       |
| Guideline Review                             |       |
| Guideline Update                             |       |
| Methods Support                              |       |
| Evidence Base                                |       |
| Level of Evidence                            |       |
| Grade recommendations                        |       |
| Recommendation 1                             |       |
| Recommendation 2                             |       |
| Recommendation 3                             |       |
| Recommendation 4                             |       |
| Recommendation 5                             |       |
| Recommendation 6                             |       |
| Recommendation 7                             |       |
| Recommendation 8                             |       |
| Recommendation 9                             |       |
| Recommendation 10                            |       |
