# Supplementary material for: Diagnosis and treatment of hyponatremia: a systematic review of clinical practice guidelines and consensus statements
Source: Springer Nature journal article supplement (doi:10.1186/s12916-014-0231-1), 2014-12-01
Supplement: MOESM3 [file 9758612]

### **Additional file 3: Table S3. Structure and Content of the AGREE instrument**

The following is adapted from the AGREE instrument (AGREE Collaboration. Appraisal of guidelines research and evaluation. London UK: The AGREE Collaboration at [www.Agreecollaboration.org](http://www.Agreecollaboration.org), 2001.)

---

| <b>Domain</b>            | <b>Content</b>                                                                                                                                                                                                               | <b>No. of items</b> |
|--------------------------|------------------------------------------------------------------------------------------------------------------------------------------------------------------------------------------------------------------------------|---------------------|
| Scope and purpose        | Addresses the overall aim of the guideline, the specific clinical questions and the target patient population                                                                                                                | 3                   |
| Stakeholder involvement  | Addresses the extent to which the guideline represents the views of its intended users (relevant professional groups, patients, target users defined, piloting among target users)                                           | 4                   |
| Rigour of development    | Addresses the process used to collect and synthesize the evidence, the methods to formulate the recommendations, process for updating the guidelines, external review                                                        | 7                   |
| Clarity and presentation | Addresses the language and format of the guideline (recommendations are specific and unambiguous, different options for management are presented, key recommendations are identifiable, tools for application are available) | 4                   |
| Applicability            | Addresses the likely organisational, behavioural, and cost implications of applying the guideline, key criteria for monitoring and/or audit purposes                                                                         | 3                   |
| Editorial independence   | Addresses the independence of the recommendations and acknowledgement of possible conflict of interest from the guideline development group                                                                                  | 2                   |

---
