# Supplementary material for: Diagnosis and treatment of hyponatremia: a systematic review of clinical practice guidelines and consensus statements
Source: Springer Nature journal article supplement (doi:10.1186/s12916-014-0231-1), 2014-12-01
Supplement: MOESM5 [file 9758612]

**Additional file 5: Table S5. Mean scores across reviewers for the individual AGREE II domain items**

|                | Domain 1.<br>Scope and Purpose |     |     | Domain 2.<br>Stakeholder involvement |     |     | Domain 3.<br>Rigour of Development |     |     |     |     |     |     | Domain 4.<br>Clarity and Presentation |     |     | Domain 5.<br>Applicability |     |     |     | Domain 6.<br>Editorial independence |     |     |
|----------------|--------------------------------|-----|-----|--------------------------------------|-----|-----|------------------------------------|-----|-----|-----|-----|-----|-----|---------------------------------------|-----|-----|----------------------------|-----|-----|-----|-------------------------------------|-----|-----|
|                | I1                             | I2  | I3  | I4                                   | I5  | I6  | I7                                 | I8  | I9  | I10 | I11 | I12 | I13 | I14                                   | I15 | I16 | I17                        | I18 | I19 | I20 | I21                                 | I22 | I23 |
| Guideline      |                                |     |     |                                      |     |     |                                    |     |     |     |     |     |     |                                       |     |     |                            |     |     |     |                                     |     |     |
| NIV            | 6.3                            | 5.3 | 5.0 | 4.0                                  | 1.5 | 5.3 | 6.0                                | 6.3 | 4.8 | 1.5 | 5.0 | 5.0 | 2.8 | 2.8                                   | 4.5 | 5.8 | 5.0                        | 5.0 | 6.3 | 4.0 | 5.0                                 | 6.0 | 5.5 |
| NHS            | 6.8                            | 3.8 | 5.8 | 1.0                                  | 1.3 | 6.8 | 4.8                                | 1.5 | 1.5 | 1.5 | 4.3 | 4.5 | 1.0 | 6.8                                   | 5.5 | 4.5 | 6.3                        | 1.3 | 2.3 | 1.3 | 2.5                                 | 3.0 | 1.3 |
| GAIN*          | 1.8                            | 1.5 | 5.0 | 5.3                                  | 1.0 | 1.0 | 1.0                                | 1.0 | 1.0 | 1.0 | 2.0 | 1.0 | 1.0 | 4.8                                   | 3.3 | 3.3 | 5.5                        | 1.0 | 3.5 | 1.0 | 2.5                                 | 3.3 | 1.0 |
| AEEH*          | 2.8                            | 1.8 | 5.5 | 1.8                                  | 1.0 | 2.5 | 1.3                                | 1.0 | 1.3 | 1.3 | 1.5 | 1.5 | 1.5 | 1.0                                   | 3.5 | 2.0 | 5.5                        | 1.5 | 1.5 | 1.3 | 2.3                                 | 1.3 | 1.0 |
| EHN*           | 3.5                            | 3.3 | 5.3 | 5.3                                  | 1.0 | 2.3 | 1.3                                | 1.0 | 1.0 | 1.3 | 2.8 | 1.8 | 2.0 | 1.0                                   | 3.5 | 2.5 | 3.3                        | 2.5 | 4.3 | 1.0 | 2.5                                 | 1.0 | 2.5 |
| ERBP/ESE/ESICM | 6.5                            | 6.5 | 6.5 | 5.0                                  | 3.5 | 6.3 | 6.3                                | 6.5 | 5.5 | 5.8 | 5.8 | 5.8 | 5.8 | 6.5                                   | 6.0 | 5.8 | 4.8                        | 5.3 | 5.3 | 3.5 | 3.5                                 | 5.8 | 4.5 |
| UF             | 6.5                            | 6.5 | 6.3 | 6.0                                  | 1.3 | 2.5 | 4.0                                | 2.8 | 3.3 | 2.5 | 2.8 | 3.8 | 1.3 | 1.0                                   | 2.8 | 4.8 | 5.5                        | 1.3 | 3.3 | 1.0 | 2.0                                 | 3.3 | 5.3 |
| HEP            | 3.0                            | 3.5 | 1.5 | 3.5                                  | 1.0 | 1.0 | 3.0                                | 1.0 | 1.8 | 1.3 | 2.8 | 2.0 | 3.0 | 1.0                                   | 2.0 | 3.0 | 3.0                        | 1.5 | 1.8 | 1.0 | 2.5                                 | 1.0 | 2.8 |
| RCHM*          | 2.5                            | 1.8 | 4.5 | 1.5                                  | 1.3 | 1.5 | 1.5                                | 1.3 | 1.0 | 2.0 | 2.0 | 1.3 | 1.5 | 6.3                                   | 5.3 | 1.8 | 3.8                        | 1.5 | 2.0 | 1.0 | 4.5                                 | 3.0 | 1.0 |
| EAH-ICD*       | 6.8                            | 6.8 | 5.3 | 6.8                                  | 3.5 | 5.0 | 2.8                                | 1.3 | 1.5 | 2.0 | 4.8 | 4.5 | 1.3 | 1.5                                   | 4.3 | 4.0 | 1.8                        | 2.5 | 6.0 | 1.0 | 3.8                                 | 5.0 | 1.0 |

NIV – Nederlandse Internisten Vereniging [16]; NHS – National Health Service [17]; GAIN - Guidelines and Audit Implementations Network [22] ; AEEH – La Asociación Española para el Estudio del Hígado [23]; EHN – European Hyponatraemia Network [25]; ERBP – European Renal Best Practice, ESE – European Society of Endocrinology, ESICM – European Society of Intensive Care Medicine [20]; UF – University of Florida [18]; HEP – Hyponatremia Expert Panel [19]; RCH Melbourne – the Royal Children’s Hospital Melbourne [21]; EAH-ICD – International Exercise-Associated Hyponatremia Consensus Development Conference [24]; [Na]: serum sodium concentration; \* classified as consensus statement
